# Supplementary material for: Absence of microglia promotes diverse pathologies and early lethality in Alzheimer’s disease mice
Source: PubMed Central journal article supplement (PMC9285116; doi:10.1016/j.celrep.2022.110961), 2022-06-14
Supplement: NIHMS1816595-supplement-1.pdf [file NIHMS1816595-supplement-1.pdf]

**Supplemental information**

**Absence of microglia promotes diverse pathologies  
and early lethality in Alzheimer's disease mice**

**Sepideh Kiani Shabestari, Samuel Morabito, Emma Pascal Danhash, Amanda McQuade, Jessica Ramirez Sanchez, Emily Miyoshi, Jean Paul Chadarevian, Christel Claes, Morgan Alexandra Coburn, Jonathan Hasselmann, Jorge Hidalgo, Kayla Nhi Tran, Alessandra C. Martini, Winston Chang Rothermich, Jesse Pascual, Elizabeth Head, David A. Hume, Clare Pridans, Hayk Davtyan, Vivek Swarup, and Mathew Blurton-Jones**

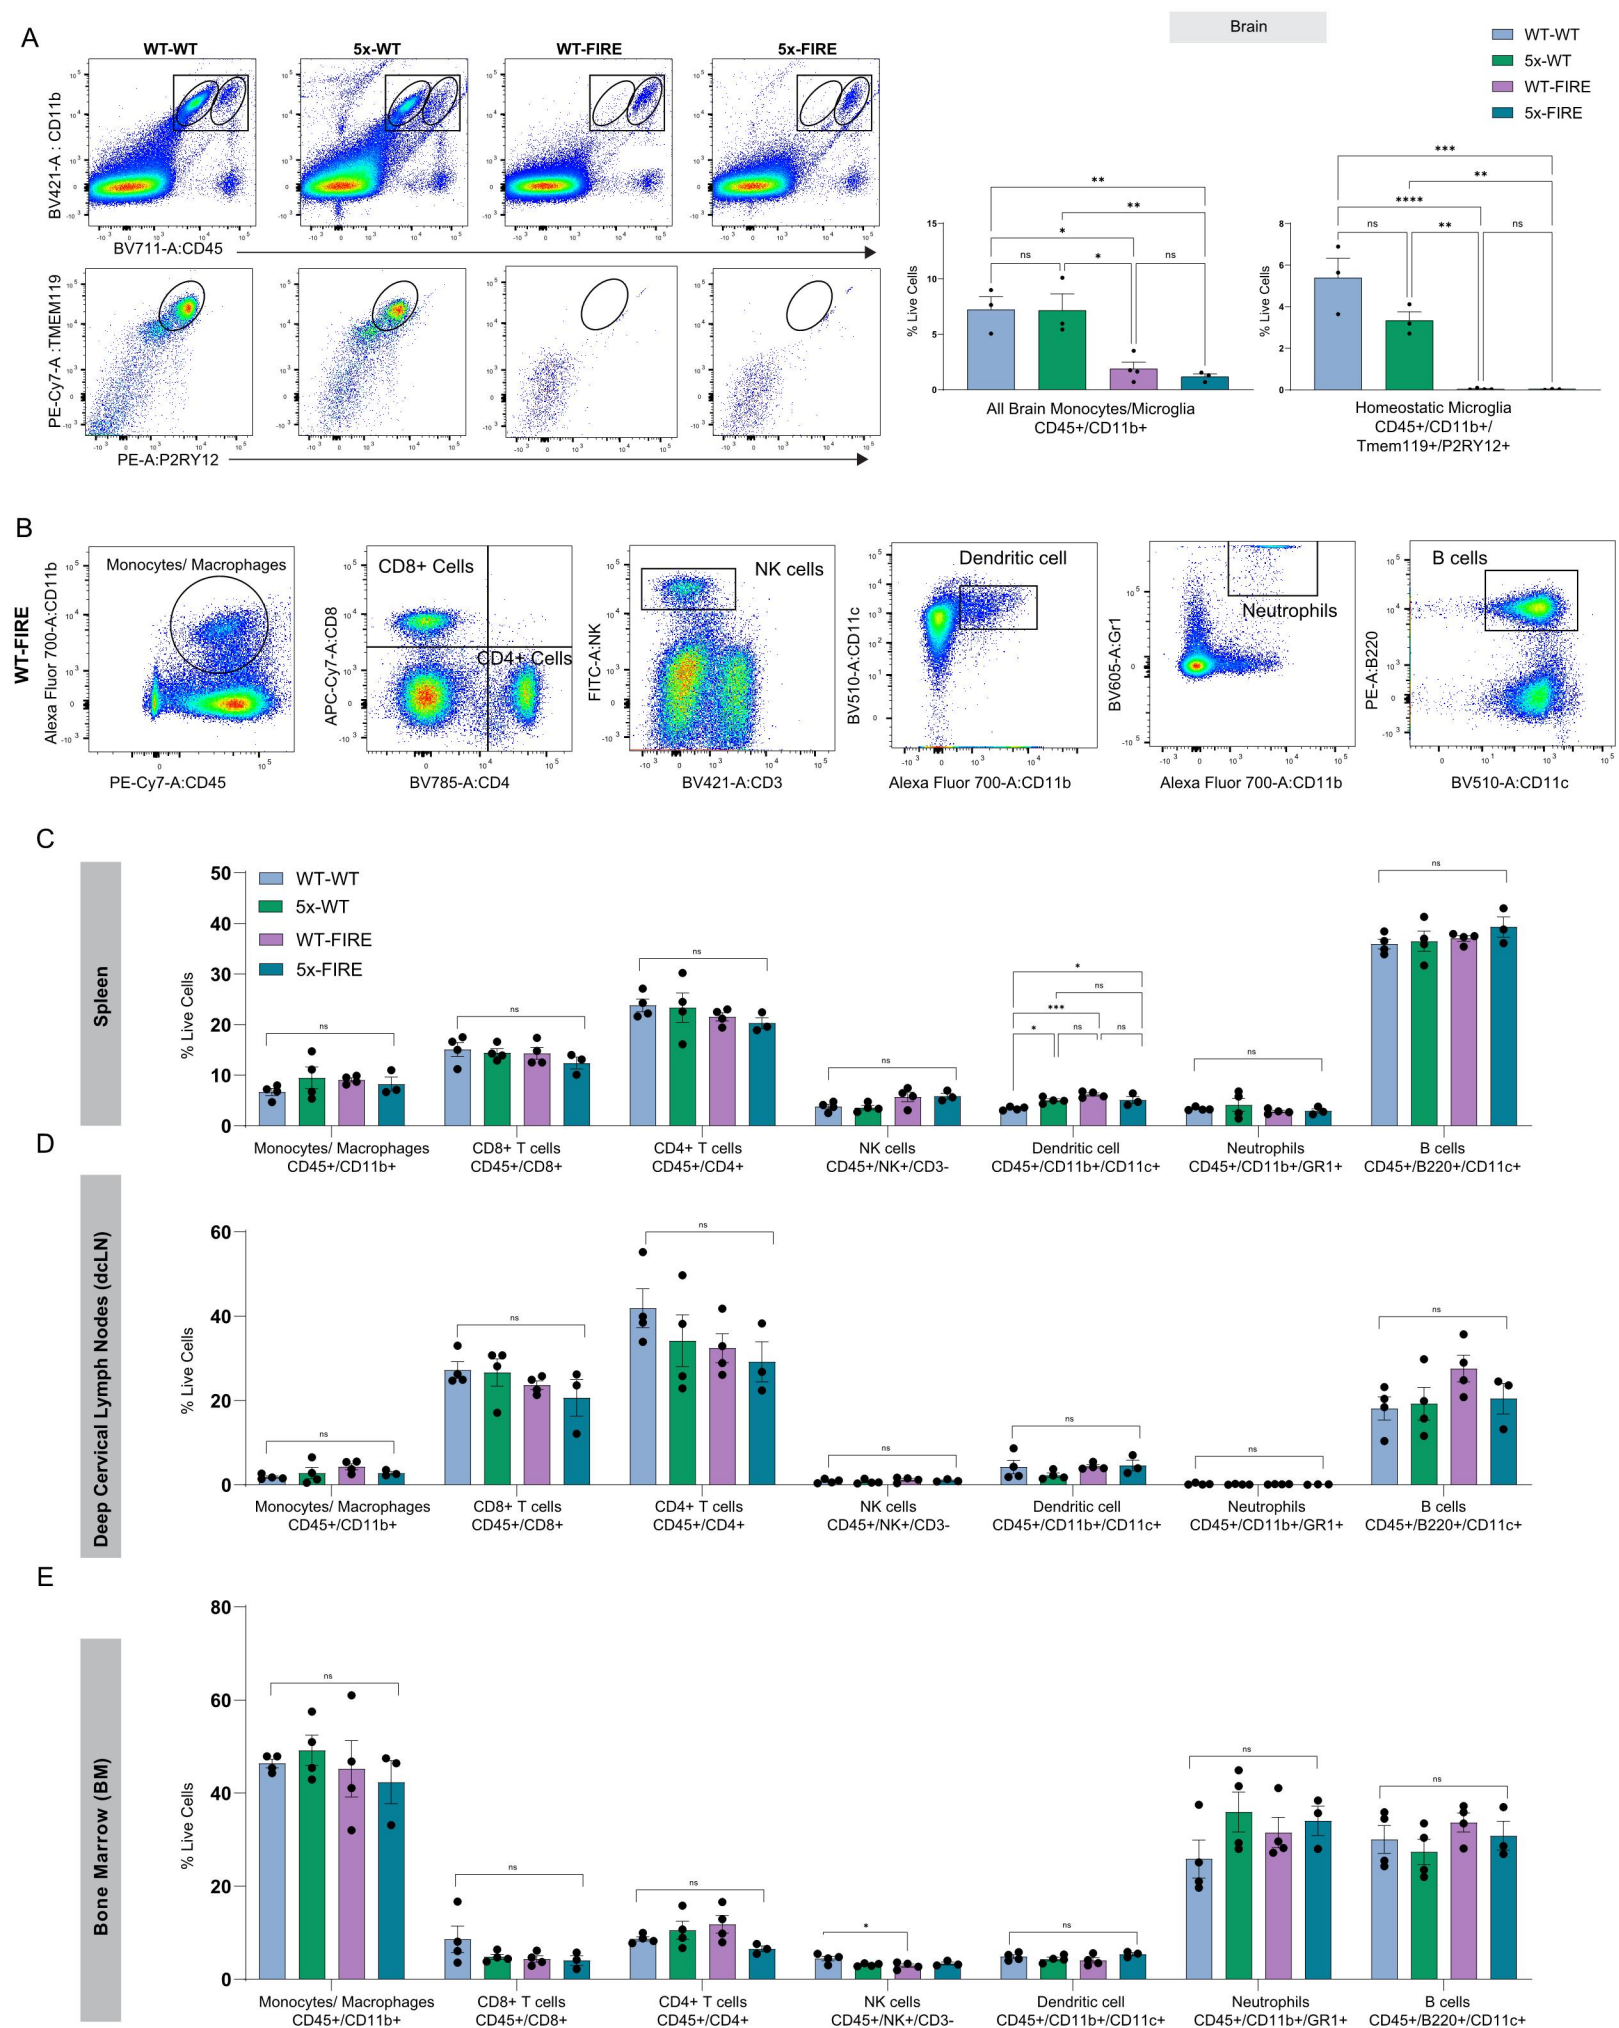

**Supplemental Figure 1: Flow cytometry confirms the loss of microglia in FIRE mice and very few other changes to immune cell populations.** Related to Figure 1. **(A)** To further confirm that FIRE mice exhibit a loss of microglia flow cytometry was performed. Initial gating for CD45 and CD11b double-labeled cells reveals two distinct populations (ovals within boxed region). CD11b<sup>+</sup>/CD45<sup>int</sup> is commonly used to identify microglia and is greatly reduced in both FIRE groups. Subsequent gating of cells for the homeostatic microglia markers P2RY12 and TMEM119 further confirmed that microglia are absent in FIRE mice, consistent with our histological and snSeq findings. **(B)** As CSF1R is also expressed in some peripheral immune lineages we next examined the proportions of major immune cell types using a panel of immunophenotyping markers. For each cell type examined we detected no differences in the percentage of immune cells across all four genotypes within the Spleen **(C)**, deep cervical lymph nodes **(D)**, and bone marrow **(E)**, with one notable exception. Dendritic cells (CD45<sup>+</sup>/CD11b<sup>+</sup>/CD11c<sup>+</sup>) exhibited a small but significant increase in 5x-WT, WT-FIRE, and 5x-FIRE groups in comparison to WT-WT mice **(C)**. All graphs presented as mean  $\pm$  s.e.m.



Figure S2

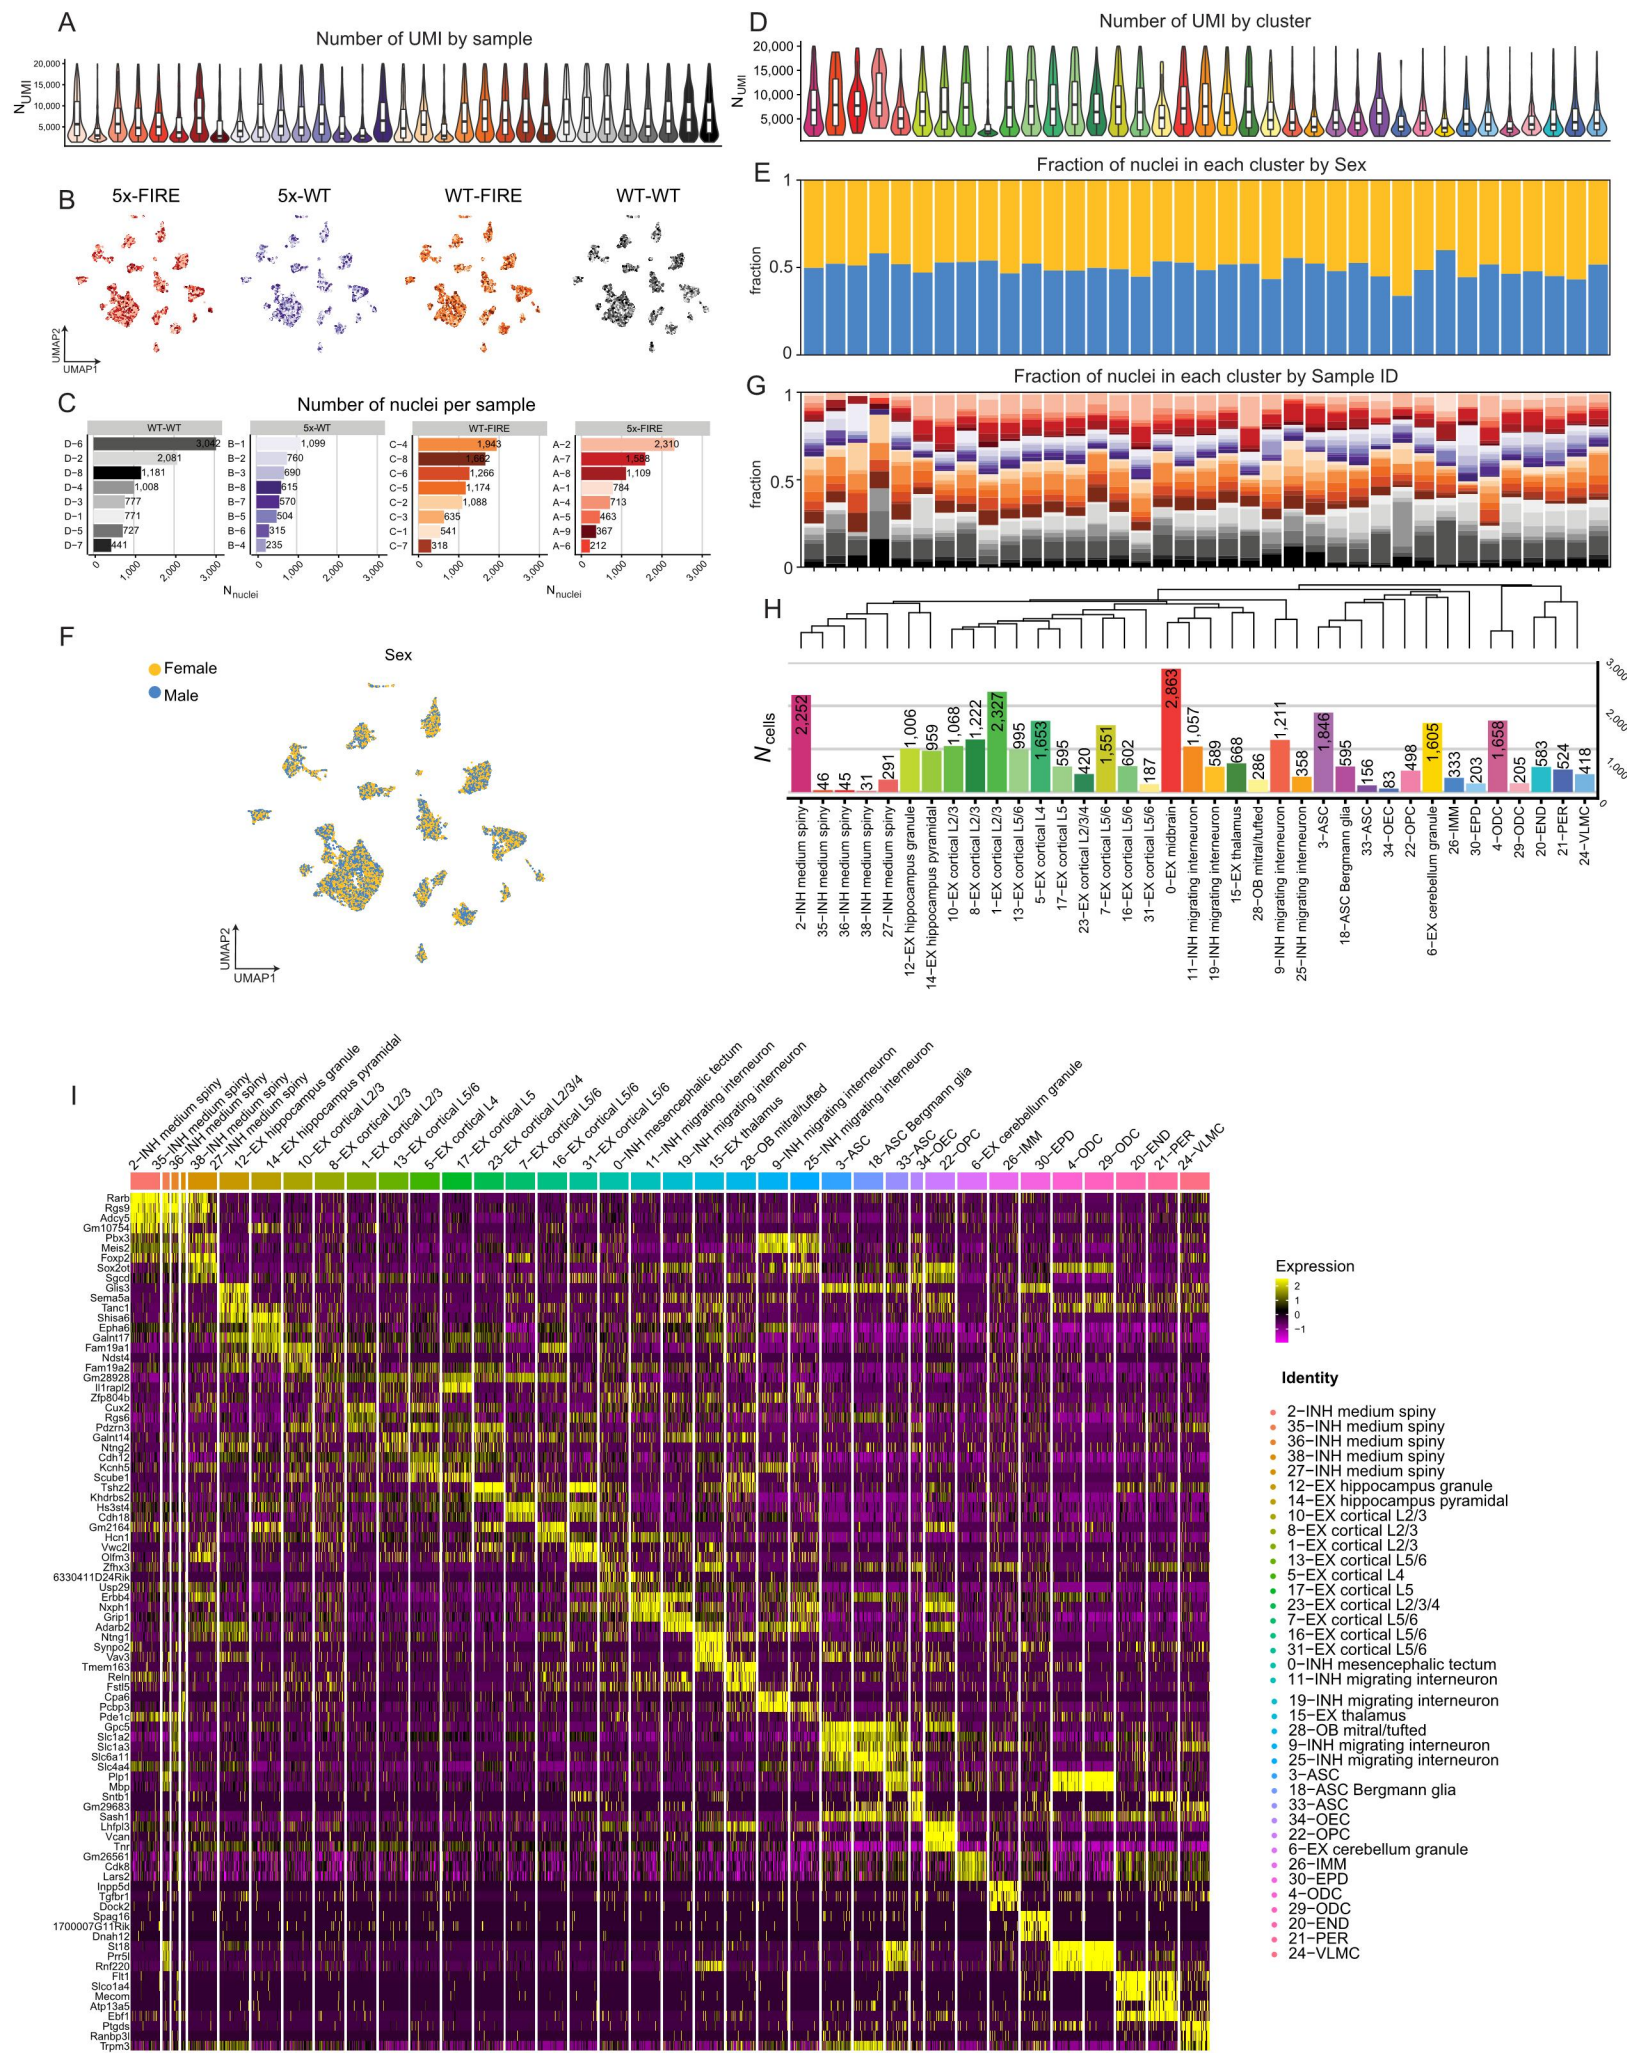



**Supplemental Figure 2: snRNA-seq data quality.** Related to Figure 1. **(A)** Violin plots showing the distribution of the number of UMIs captured in each biological for the 5x-FIRE, 5xFAD, WT-FIRE, and WT-WT conditions. **(B)** UMAP plots colored split by cells from each of the four genotypes and colored by sample of origin. **(C)** Bar plot reporting the number of nuclei recovered in each sample in each genotype. **(D)** Violin plots showing the distribution of the number of UMIs for each cluster. **(E)** Stacked bar plot showing the normalized proportion of nuclei from male (n=4/genotype) and female (n=4/genotype) samples in each cell cluster. **(F)** UMAP plot colored by sex demonstrated equivalent representation within each cluster. **(G)** Stacked bar plot showing the normalized proportion of nuclei from each biological sample in each cluster. **(H)** Bar plot showing the number of nuclei for each cell cluster. The dendrogram represents a hierarchical clustering of gene expression values averaged in each cluster for the top 25 cluster marker genes in each cluster, ordering clusters based on transcriptional similarity. **(I)** Heatmap showing additional enriched genes for each cluster. For box and whisker plots in panels **(A)** and **(D)**, box boundaries correspond to the interquartile range (IQR), the line represents the median, and the whiskers extend to the lowest/highest points that are not further than 1.5 times the IQR from the box boundary.

Figure S3

Seurat Label Transfer with Rosenberg et al. 2018 SPLiT-seq data

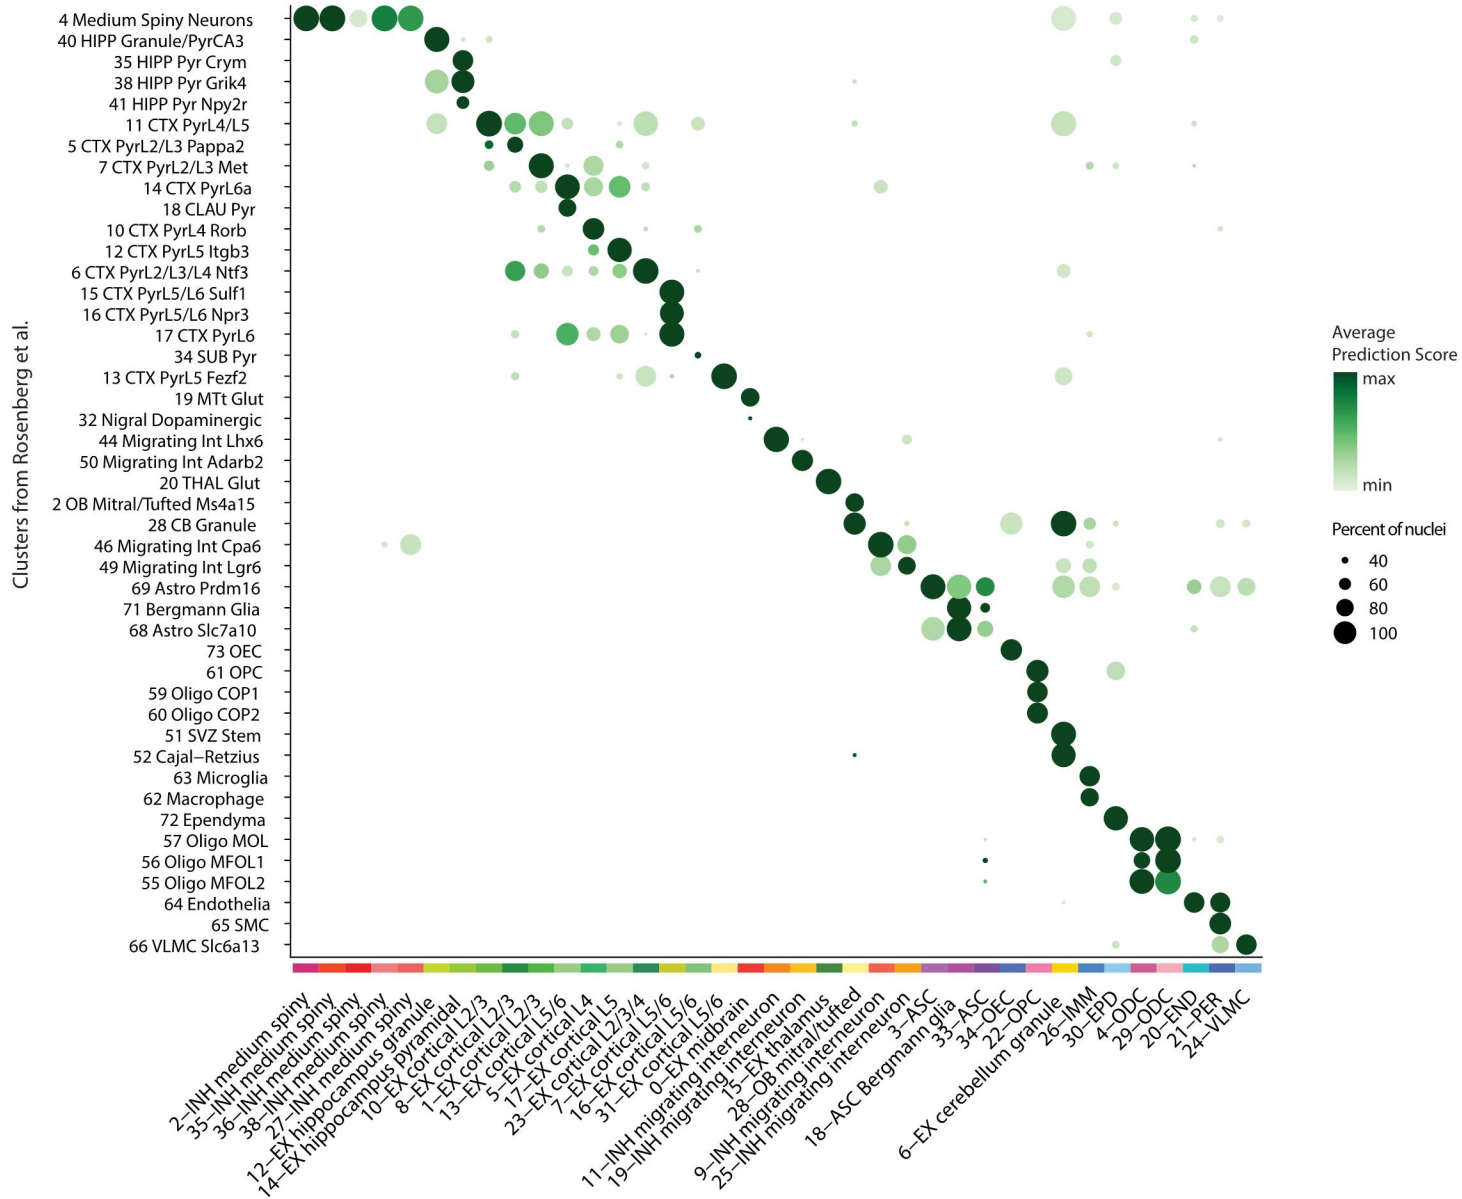

**Supplemental Figure 3: Supervised label transfer analysis predicts snRNA-seq cell identity.** Related to Figure 1. Seurat v3 Label Transfer algorithm was used to predict the cell-type identity of each cell in our snRNA-seq dataset based on the annotations and transcriptomic profiles provided in the (Rosenberg et al., 2018) mouse brain snRNA-seq dataset. We report the results in a dot plot where the color of the dot represents the average prediction score in each of our snRNA-seq clusters, and the size of the dot represents the percent of nuclei in each cluster with the predicted score for that cell-type. The horizontal axis shows the different cell annotations from the reference dataset, while the vertical axis shows the cell clusters from the snRNA-seq dataset in the present study.



Diagram of A $\beta$  Surface analysis3D View- A $\beta$  Gallery-Classified by Length

A

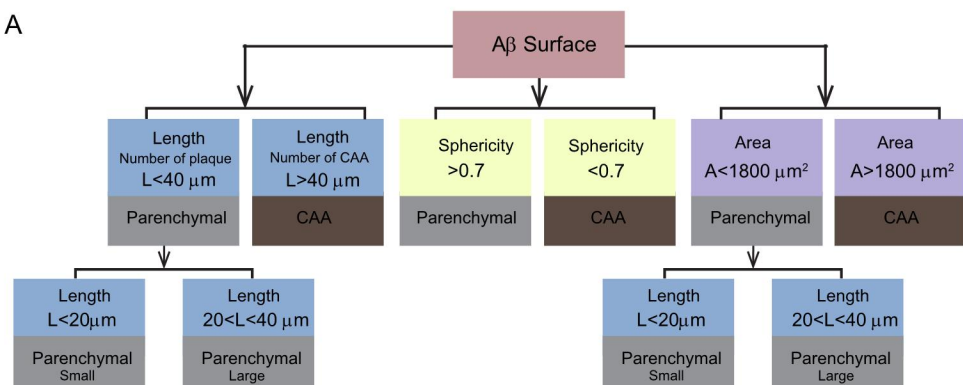

B

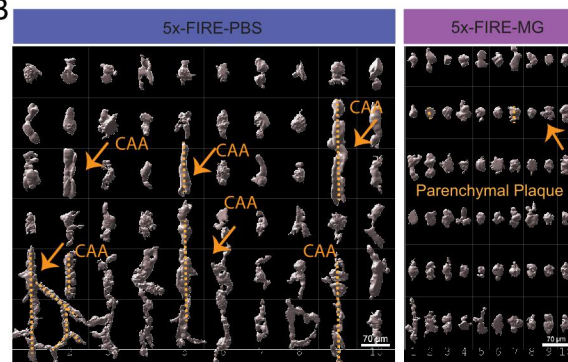

## Surface analysis of plaque and CAA based on length

## Plaque sphericity analysis

C

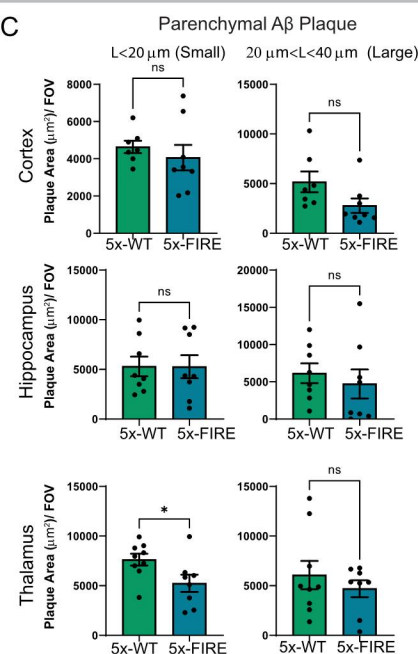

D

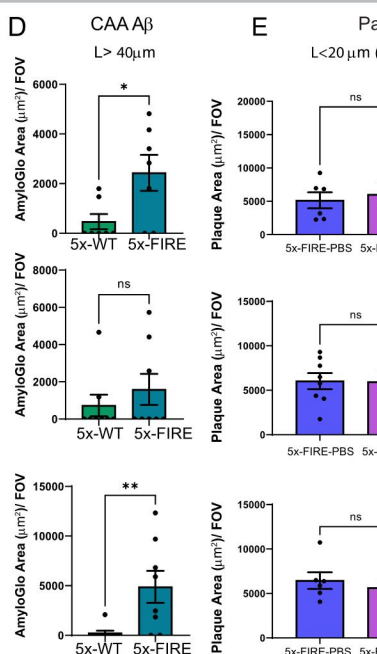

E

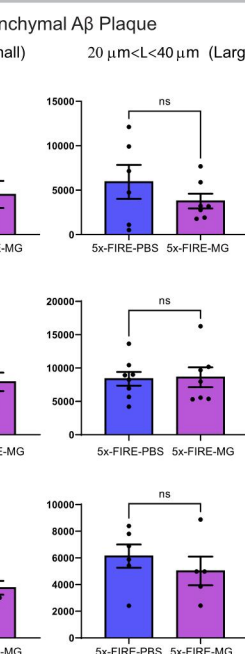

F

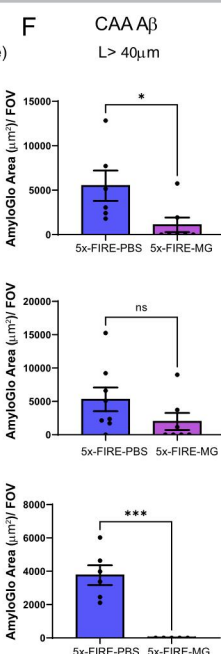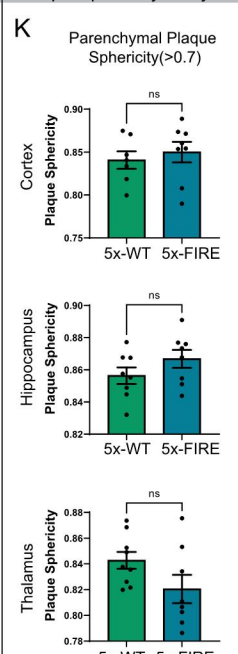

## Surface analysis of plaque and CAA based on area

G

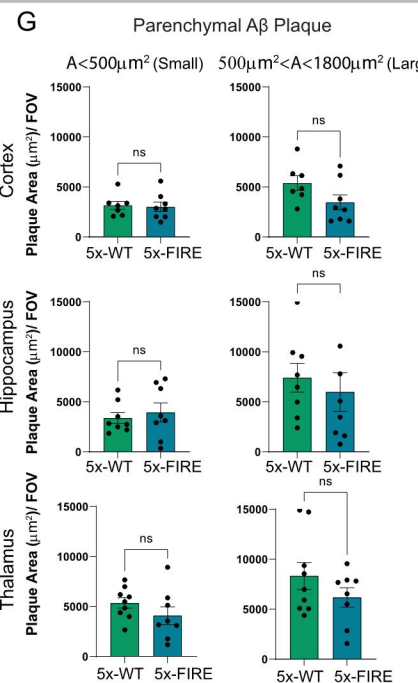

H

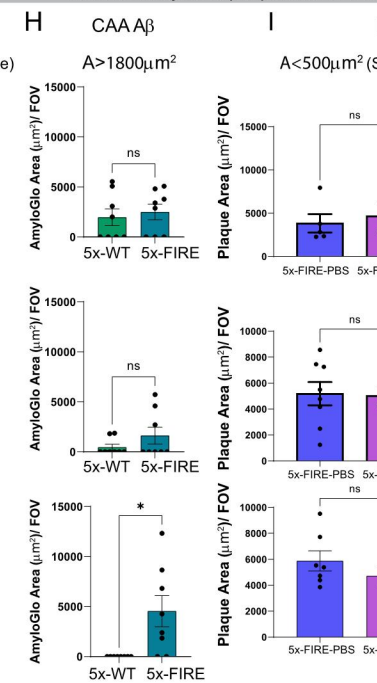

I

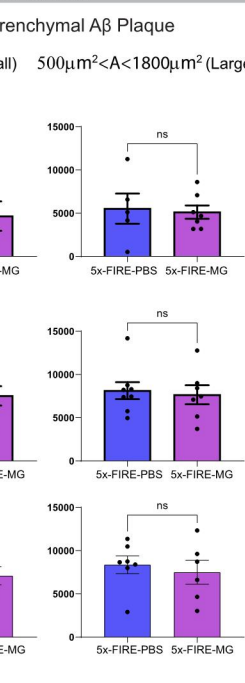

J

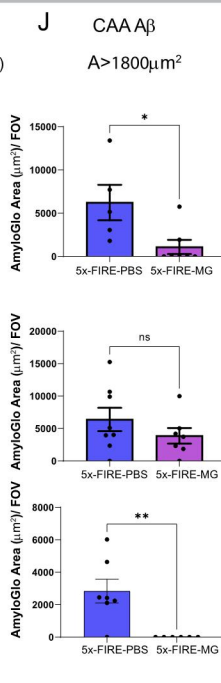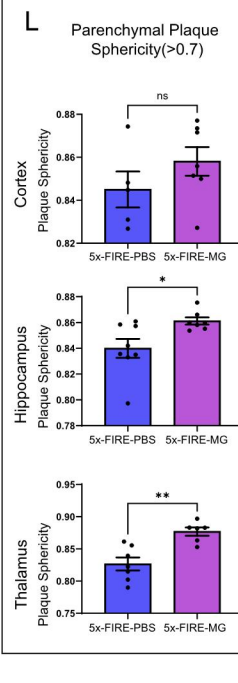

**Supplemental Figure 4: Additional analysis of Ab pathologies.** Related to Figure 2 and 4 **(A)** Schematic of IMARIS plaque and CAA classification. **(B)** Representative IMARIS 3D rendering of CAA morphology in 5x-FIRE-PBS mice and a restoration of parenchymal plaques in 5x-FIRE-MG mice. **(C)** The area occupied by small (<20mm) and large (>20mm and <40mm) parenchymal plaques remains unchanged in 5x-FIRE mice cortex and hippocampus. However, small plaques within the thalamus are reduced in 5x-FIRE mice. **(D)** In contrast, the area occupied by CAA (length  $\geq 40$ mm) is significantly increased within the cortex and thalamus. **(E)** The area occupied by small and large parenchymal plaques also remains unchanged between 5x-FIRE-PBS and 5x-FIRE-MG groups following microglial transplantation. **(F)** However, microglial transplantation significantly reduced area of CAA in 5x-FIRE-MG mice. **(G-J)** Very similar results are obtained when plaques and CAA are classified in IMARIS based on the area occupied by plaques (<1800mm<sup>2</sup>) versus CAA (>1800 mm<sup>2</sup>). Whereas no difference in plaque sphericity is detected between 5x-WT and 5x-FIRE groups **(K)** a significant increase in sphericity is observed within the hippocampus and thalamus following microglia transplantation **(L)**. All data presented as mean  $\pm$  s.e.m.

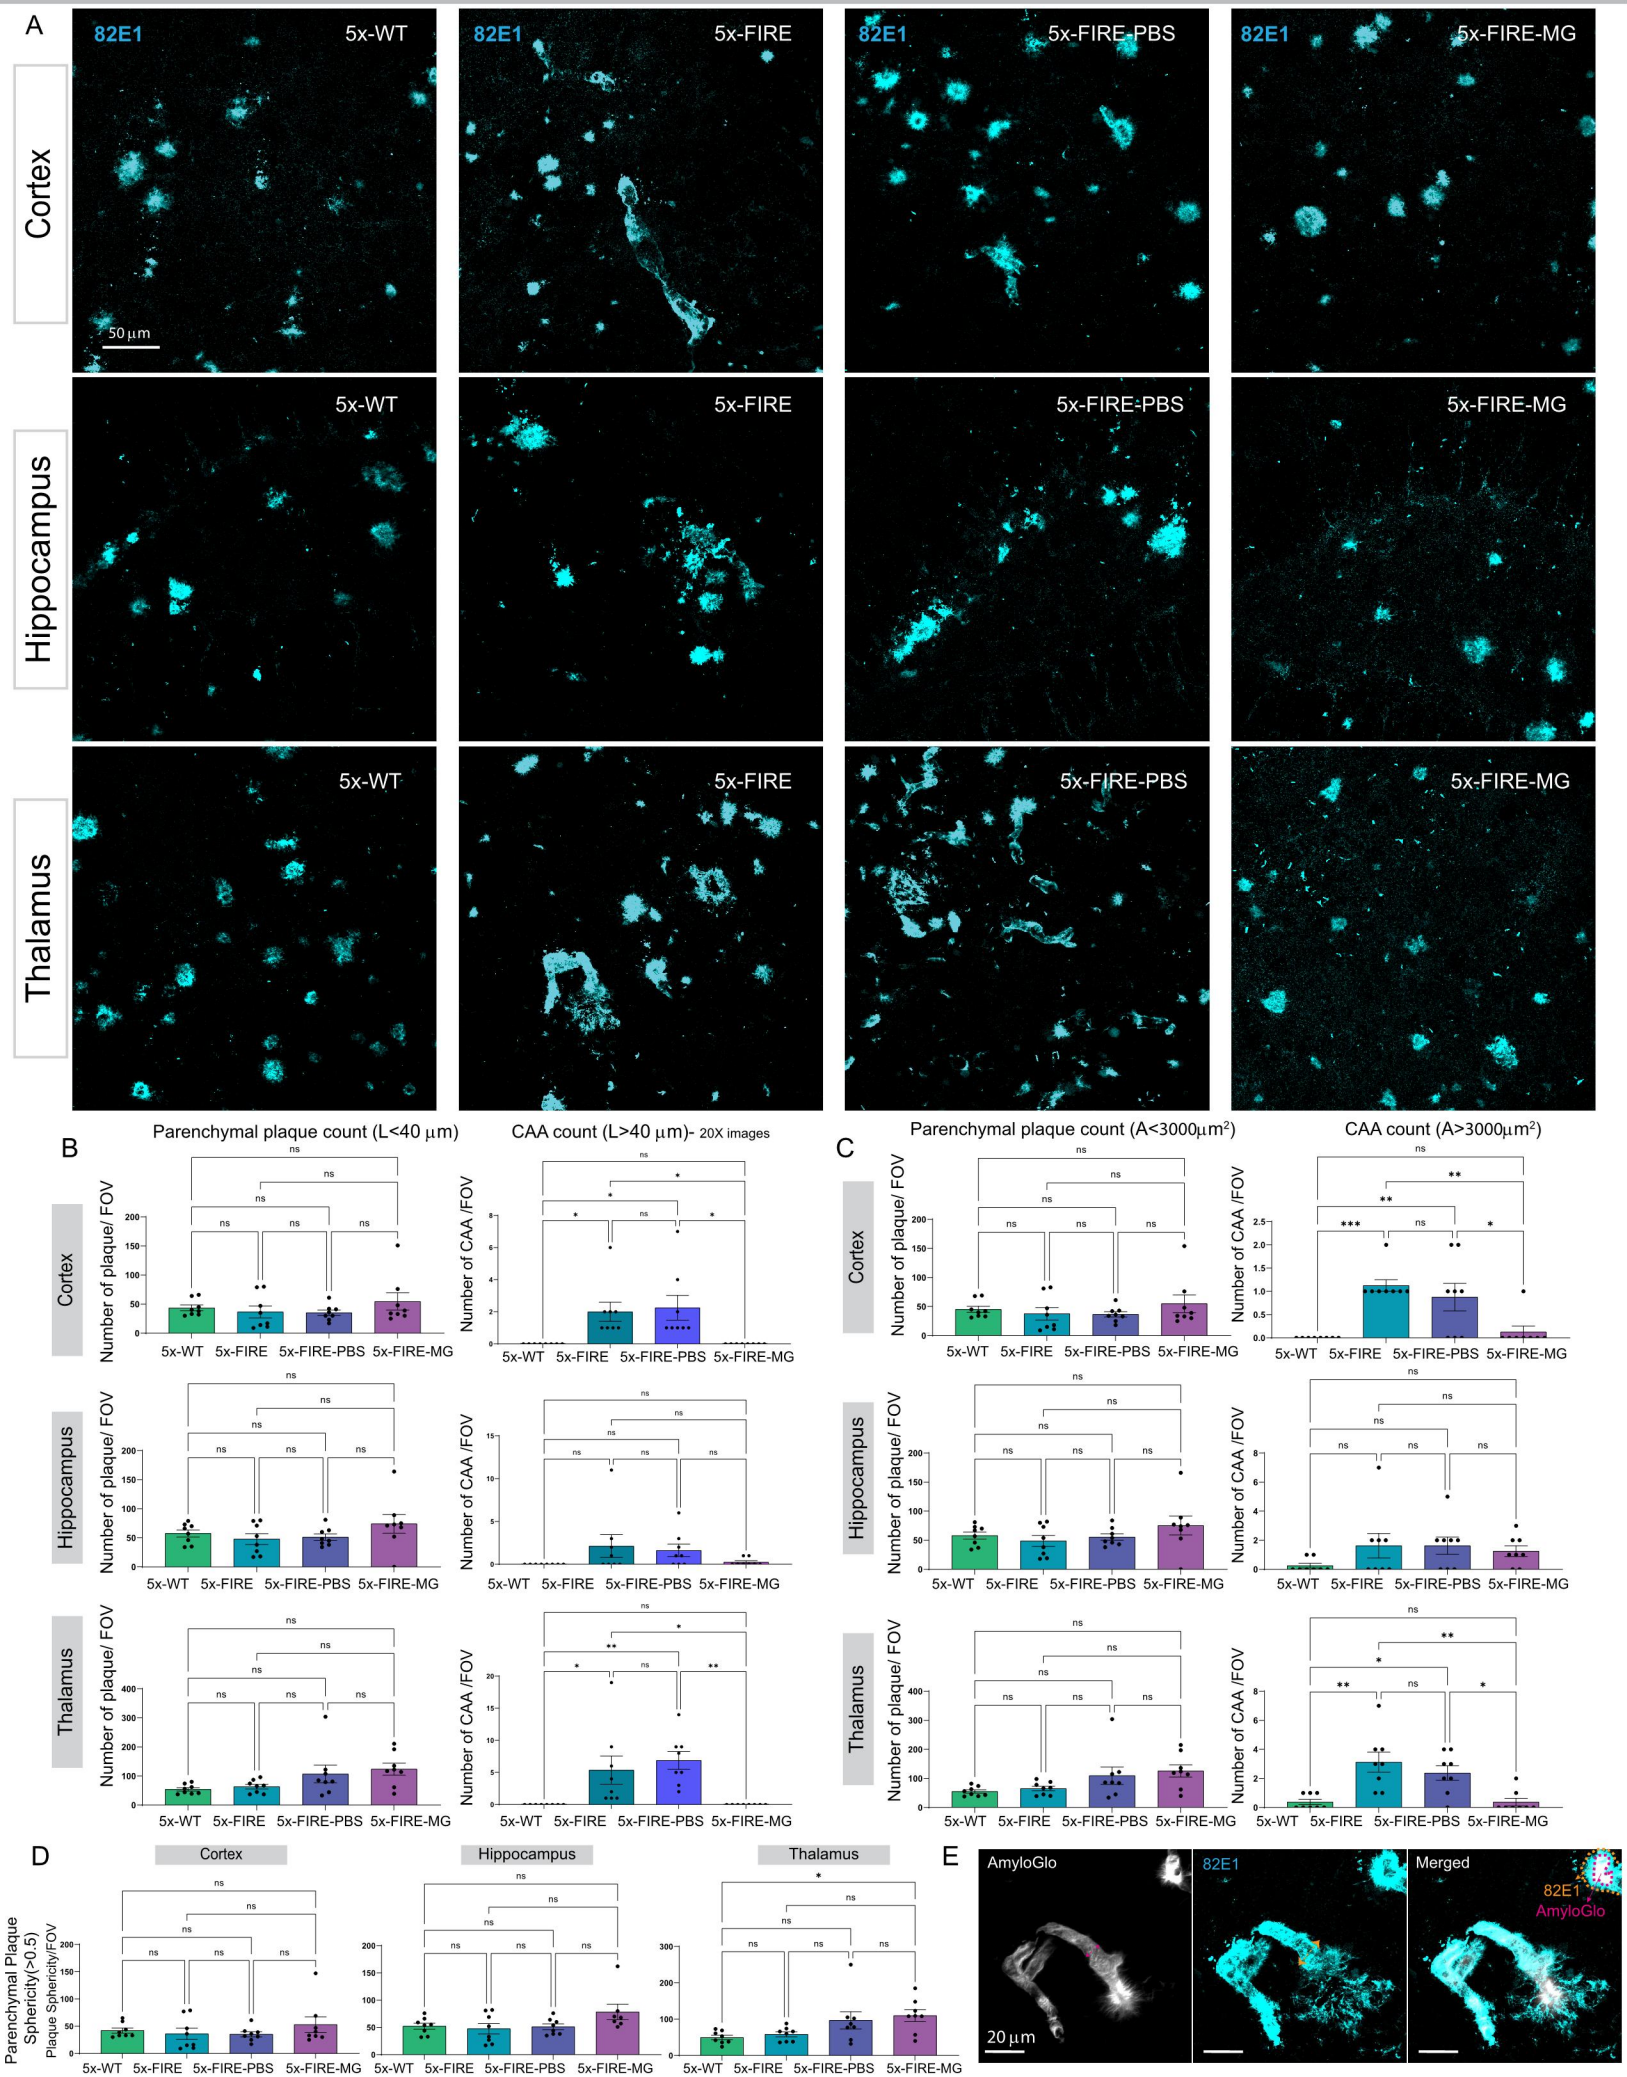



**Supplemental Figure 5: Analysis of beta-amyloid antibody immunoreactivity closely mimics results observed with Amylo-Glo.** Related to Figure 2 and 4. **(A)** As Amylo-Glo labels dense-core plaques more intensely than diffuse plaques, additional analysis of Ab pathology was performed using a biotinylated antibody against human Ab (82E1). **(A)** Confocal images reveal a similar shift in distribution of Ab pathology from parenchymal plaques to CAA in 5x-FIRE mice and a subsequent reversal of these changes in 5x-FIRE-MG mice within the cortex, hippocampus, and thalamus. IMARIS-based quantification of plaque and CAA numbers via either length-based **(B)** or area-based **(C)** classification reveals few changes in plaque numbers but significant increases in CAA that are largely reversed by microglia transplantation. **(D)** Sphericity of plaques is also largely unchanged except within the thalamus where microglial transplantation increases plaque sphericity. **(E)** Co-labeling of 82E1 with Amylo-Glo shows that whereas both approaches sufficiently label CAA, antibody-based labeling detects more diffuse amyloid pathology that surrounds AmyloGlo+ fibrillar deposits. Scale Bars =50mm in A and 20mm in E. All data presented as mean  $\pm$  s.e.m.

Figure S6

A

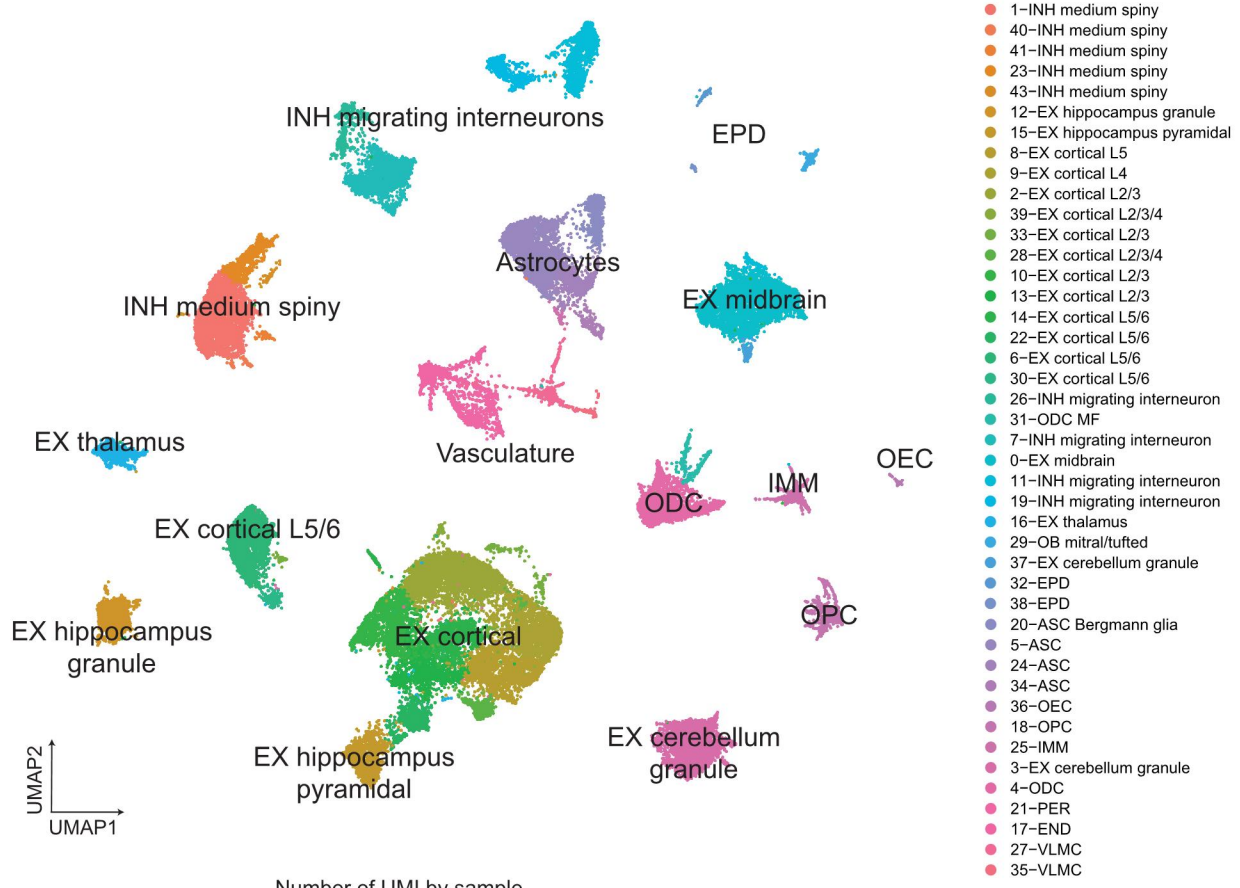

B

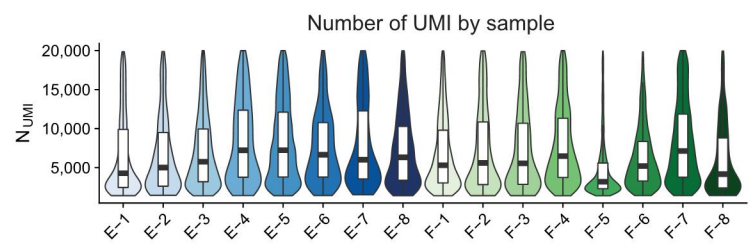

C

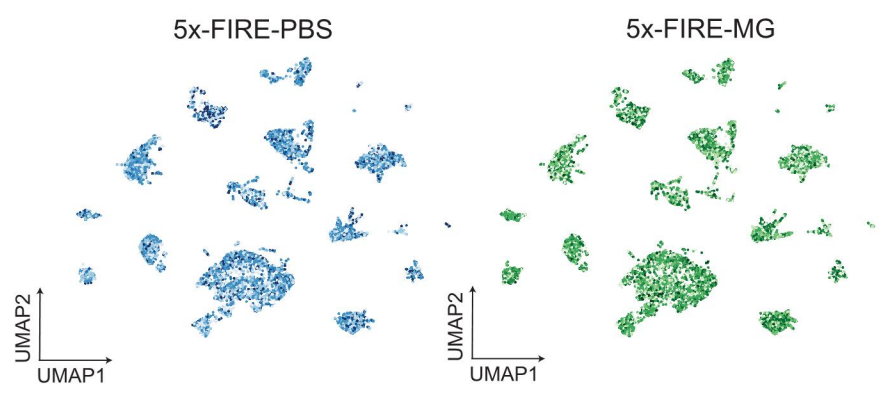

D

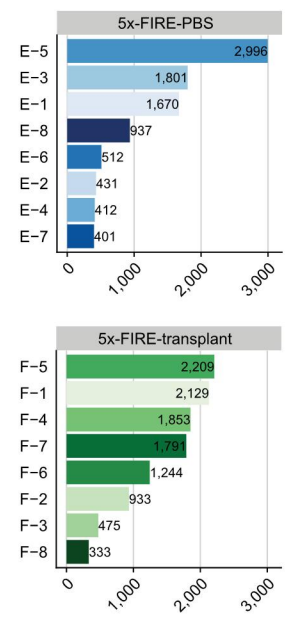

E

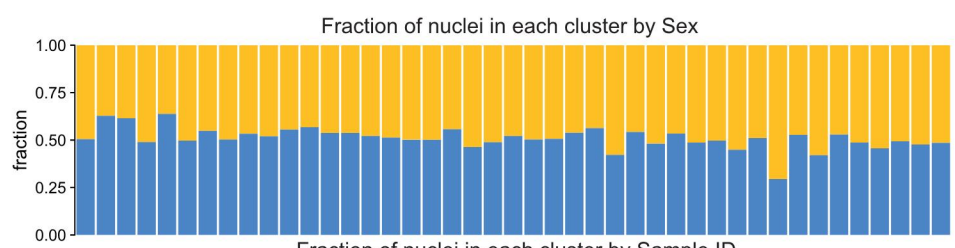

G

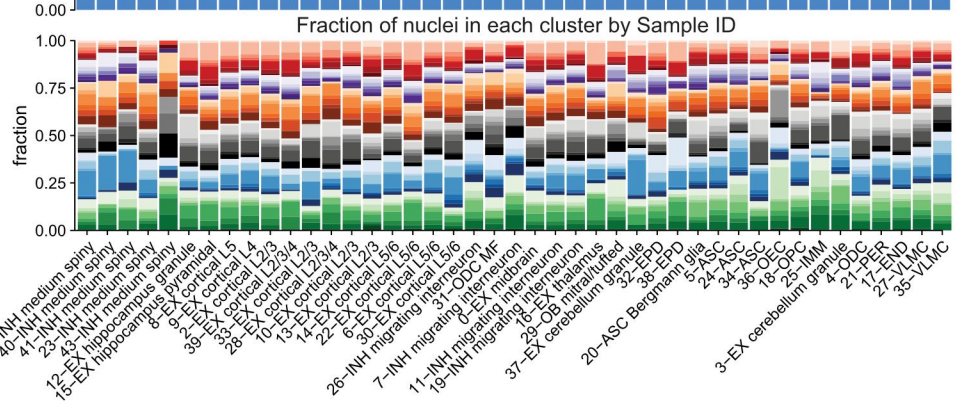

F

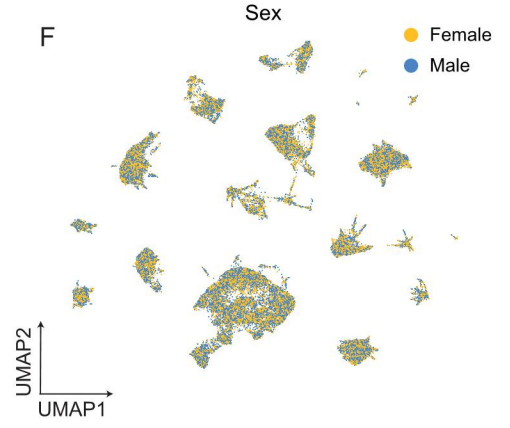

**Supplemental Figure 6: snRNA-seq analysis including the 5xFIRE transplanted microglia condition.** Related to Figure 5. **(A)** UMAP plot colored by leiden cluster assignment for 43 clusters. Major cell lineages are annotated directly on the plot. **(B)** Violin plots showing the distribution of the number of UMIs captured in each biological sample for the 5xFIRE-PBS and 5xFIRE-MG conditions. Box boundaries correspond to the interquartile range (IQR), the line represents the median, and the whiskers extend to the lowest/highest points that are not further than 1.5 times the IQR from the box boundary. **(C)** UMAP plots as in (A) subset by nuclei with from 5xFIRE-PBS (left) and 5xFIRE-MG (right) conditions, colored by biological sample of origin. **(D)** Bar plot reporting the number of nuclei recovered in each sample from the 5xFIRE-PBS and 5xFIRE-MG groups after quality-control filtering. **(E)** Stacked bar plot showing the normalized proportion of nuclei from male and female samples in each cell cluster. **(F)** UMAP plot as in (A) where cells are colored by sex. **(G)** Stacked bar plot showing the normalized proportion of nuclei from each biological sample in each cluster.



Figure S7

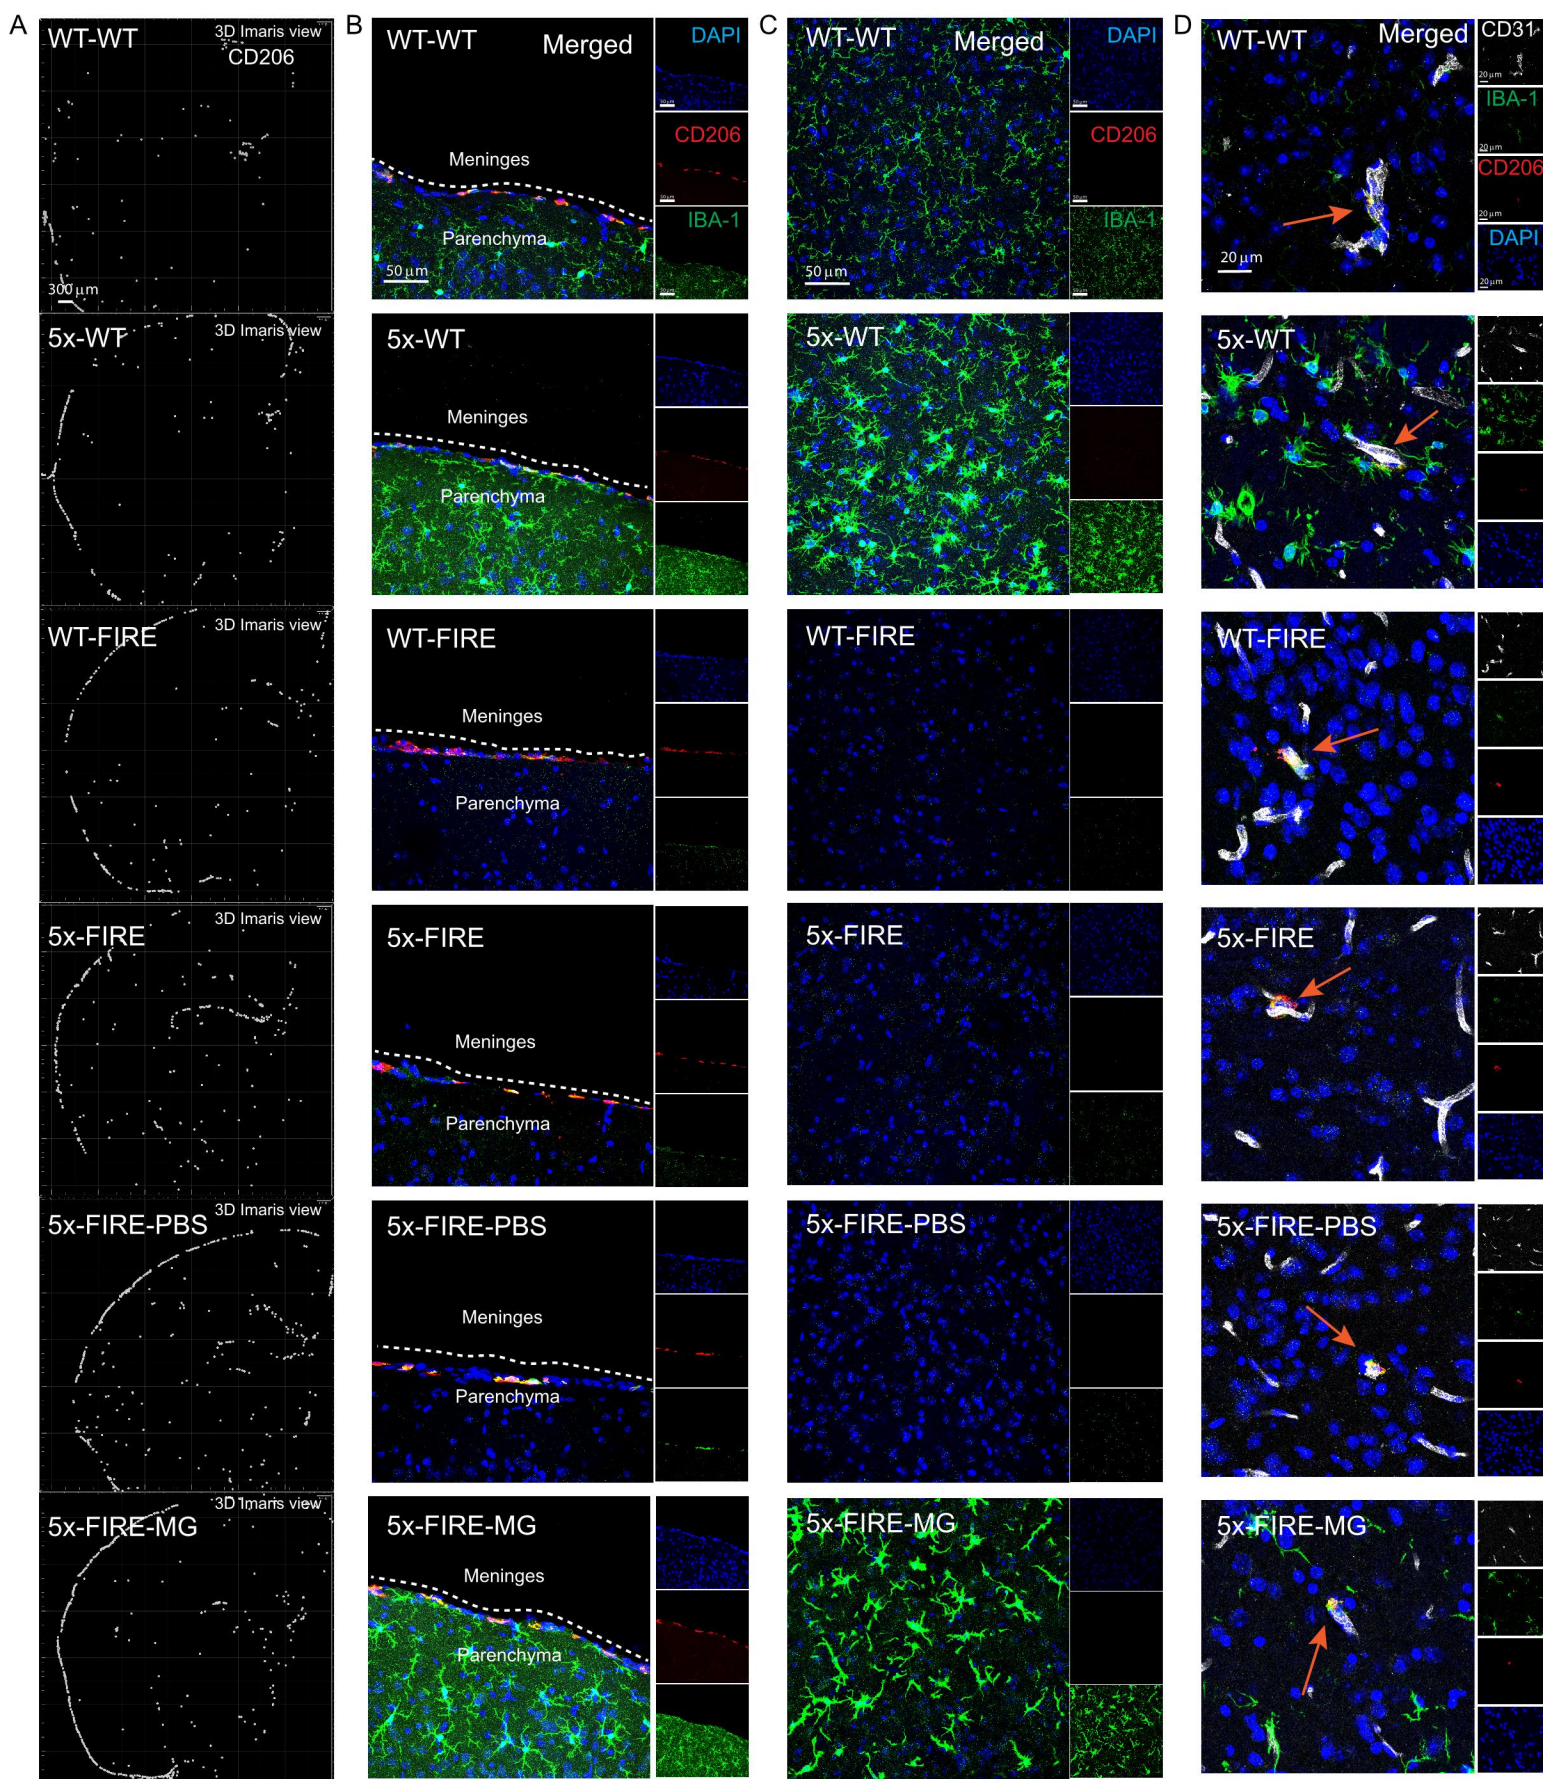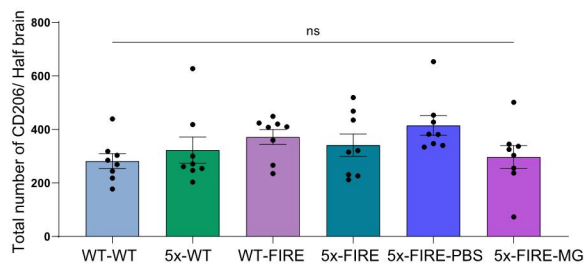

**Supplemental Figure 7: Meningeal and perivascular macrophages remain unchanged in FIRE mice.** Related to Figure 1, 2, and 3. **(A)** Although previous studies detected no changes in meningeal and perivascular macrophage populations in FIRE mice it is possible that the additional impact of beta-amyloid pathology could alter these populations. Therefore, CD206 immunolabeling was used to detect and quantify these populations in each of the six groups of mice. **(A)** Low power stiches from confocal Z-stack images were examined by IMARIS spot detection and white dots placed to depict CD206+ cells. Co-labeling with DAPI (blue), CD206 (red), and IBA-1 (green) illustrates the localization of CD206+ meningeal macrophages **(B)** and a lack of CD206 staining within parenchymal microglia **(C)**. CD206+ cells are also occasionally observed directly adjacent to CD31+ blood vessel endothelial cells **(D)** demonstrating the detection of perivascular macrophages. **(E)** Quantification of total CD206+ cells within the brains of each genotype reveal no significant differences. Scale Bars =300mm in A, 50mm in B and C, 20mm in D. All data presented as mean  $\pm$  s.e.m.



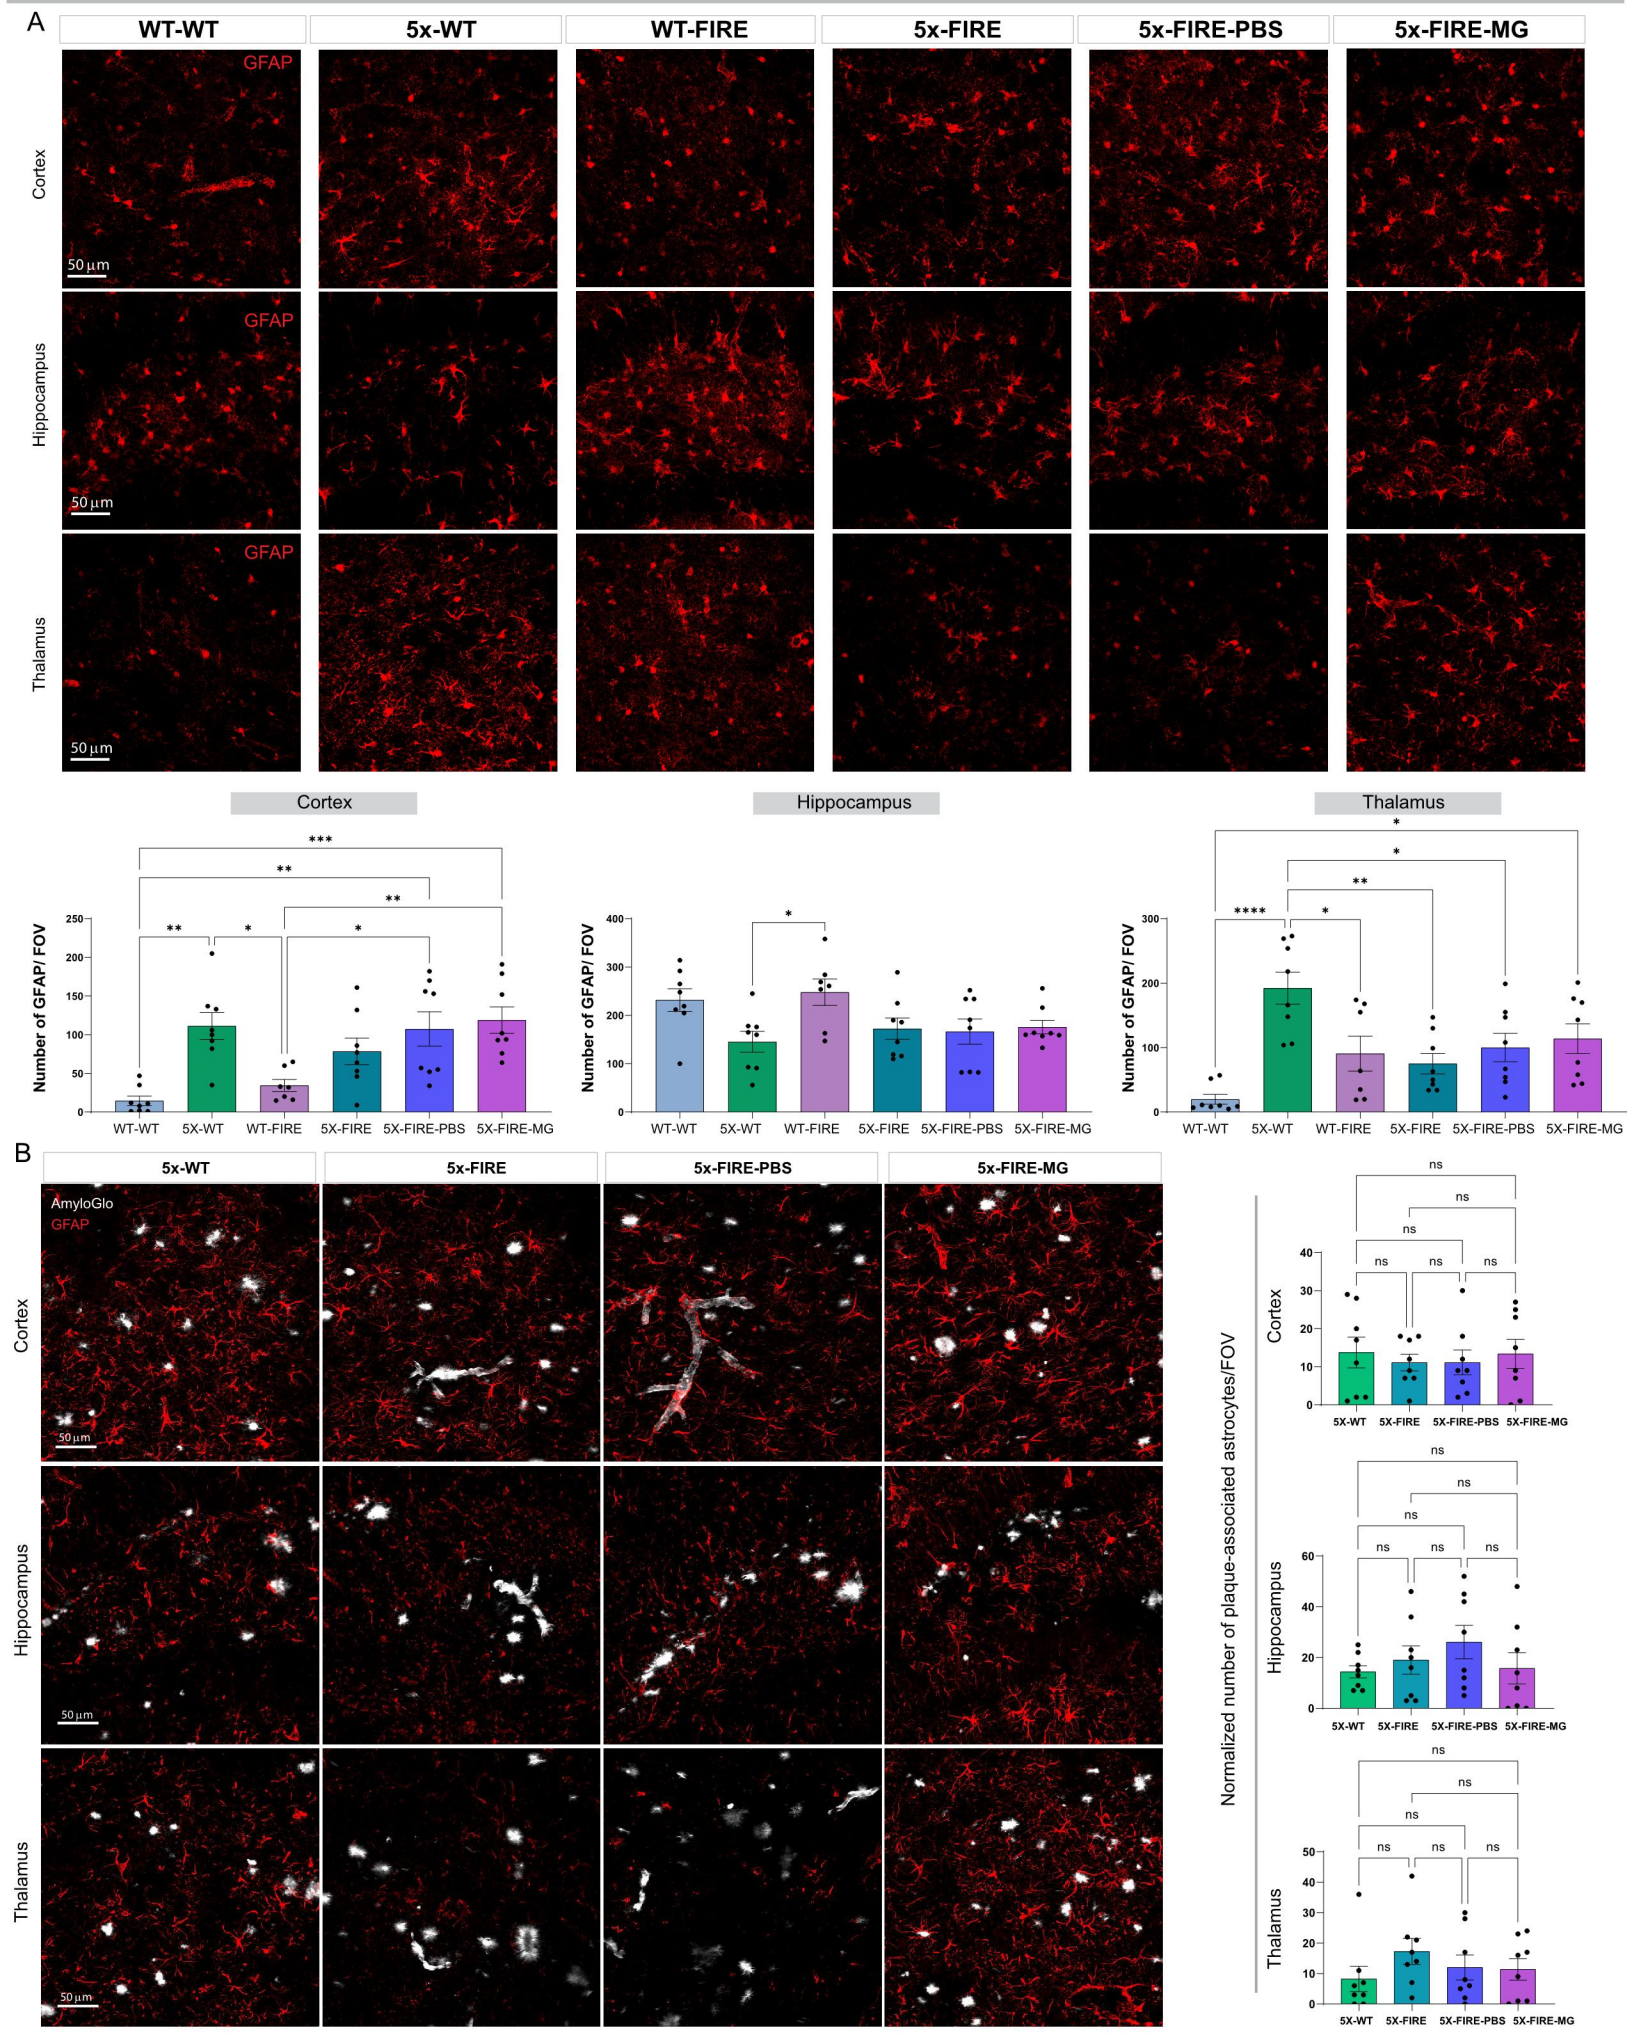



**Supplemental Figure 8: Few changes in astrocyte numbers are detected in 5x-FIRE mice.** Related to Figure 2 and 4. To determine whether the absence of microglia in FIRE mice impacts the number or responsiveness of astrocytes to Ab plaques we examined GFAP immunoreactivity. **(A)** GFAP immunoreactivity within the cortex, hippocampus, and thalamus of all six groups of mice is shown. Quantification revealed a significant increase in GFAP+ astrocytes within the cortex and thalamus of 5x-WT mice versus WT-WT mice but few differences between 5x-WT and 5x-FIRE groups. However, astrocyte numbers within the thalamus were significantly reduced in 5x-FIRE versus 5x-WT mice and partially restored following microglial transplantation. **(B)** To determine whether 5x-FIRE mice exhibit an altered association between astrocytes and Ab pathology proximity of astrocytes to Ab plaques were quantified but revealed no significant differences. Scale Bars =50mm in A and B. All data presented as mean  $\pm$  s.e.m.



**Supplemental Figure 9: Gene co-expression networks in endothelial cells and pericytes.** Related to Figure 1, 3, 5, and 6. **(A)** scWGCNA dendrogram showing co-expression modules in endothelial cells and pericytes (END and PER) with gene module assignments shown below. **(B)** Row-normalized heatmap of Seurat module scores by SPLiT-seq clusters for all PER/END WGCNA modules as in (A). **(C)** Box and whisker plots with underlying data points for END-M1 eigengene values split by experimental condition. Box boundaries correspond to the interquartile range (IQR), the line represents the median, and the whiskers extend to the lowest/highest points that are not further than 1.5 times the IQR from the box boundary. **(D)** Co-expression network plot showing the 25 most connected genes for END-M1. **(E)** Bar plot showing GO term enrichment for END-M1 genes. **(F)** UMAP colored by Seurat module score for END-M1 with END and PER clusters circled. **(G-J):** Eigengene box and whisker plot, co-expression network plot, GO term enrichment, and module score UMAP as in (C-F) for END-M2. For box and whisker plots, two-sided Wilcoxon test was used to compare selected groups; not significant,  $P > 0.05$ ; \* $P \leq 0.05$ , \*\* $P \leq 0.01$ , \*\*\* $P \leq 0.001$ , \*\*\*\* $P \leq 0.0001$ .

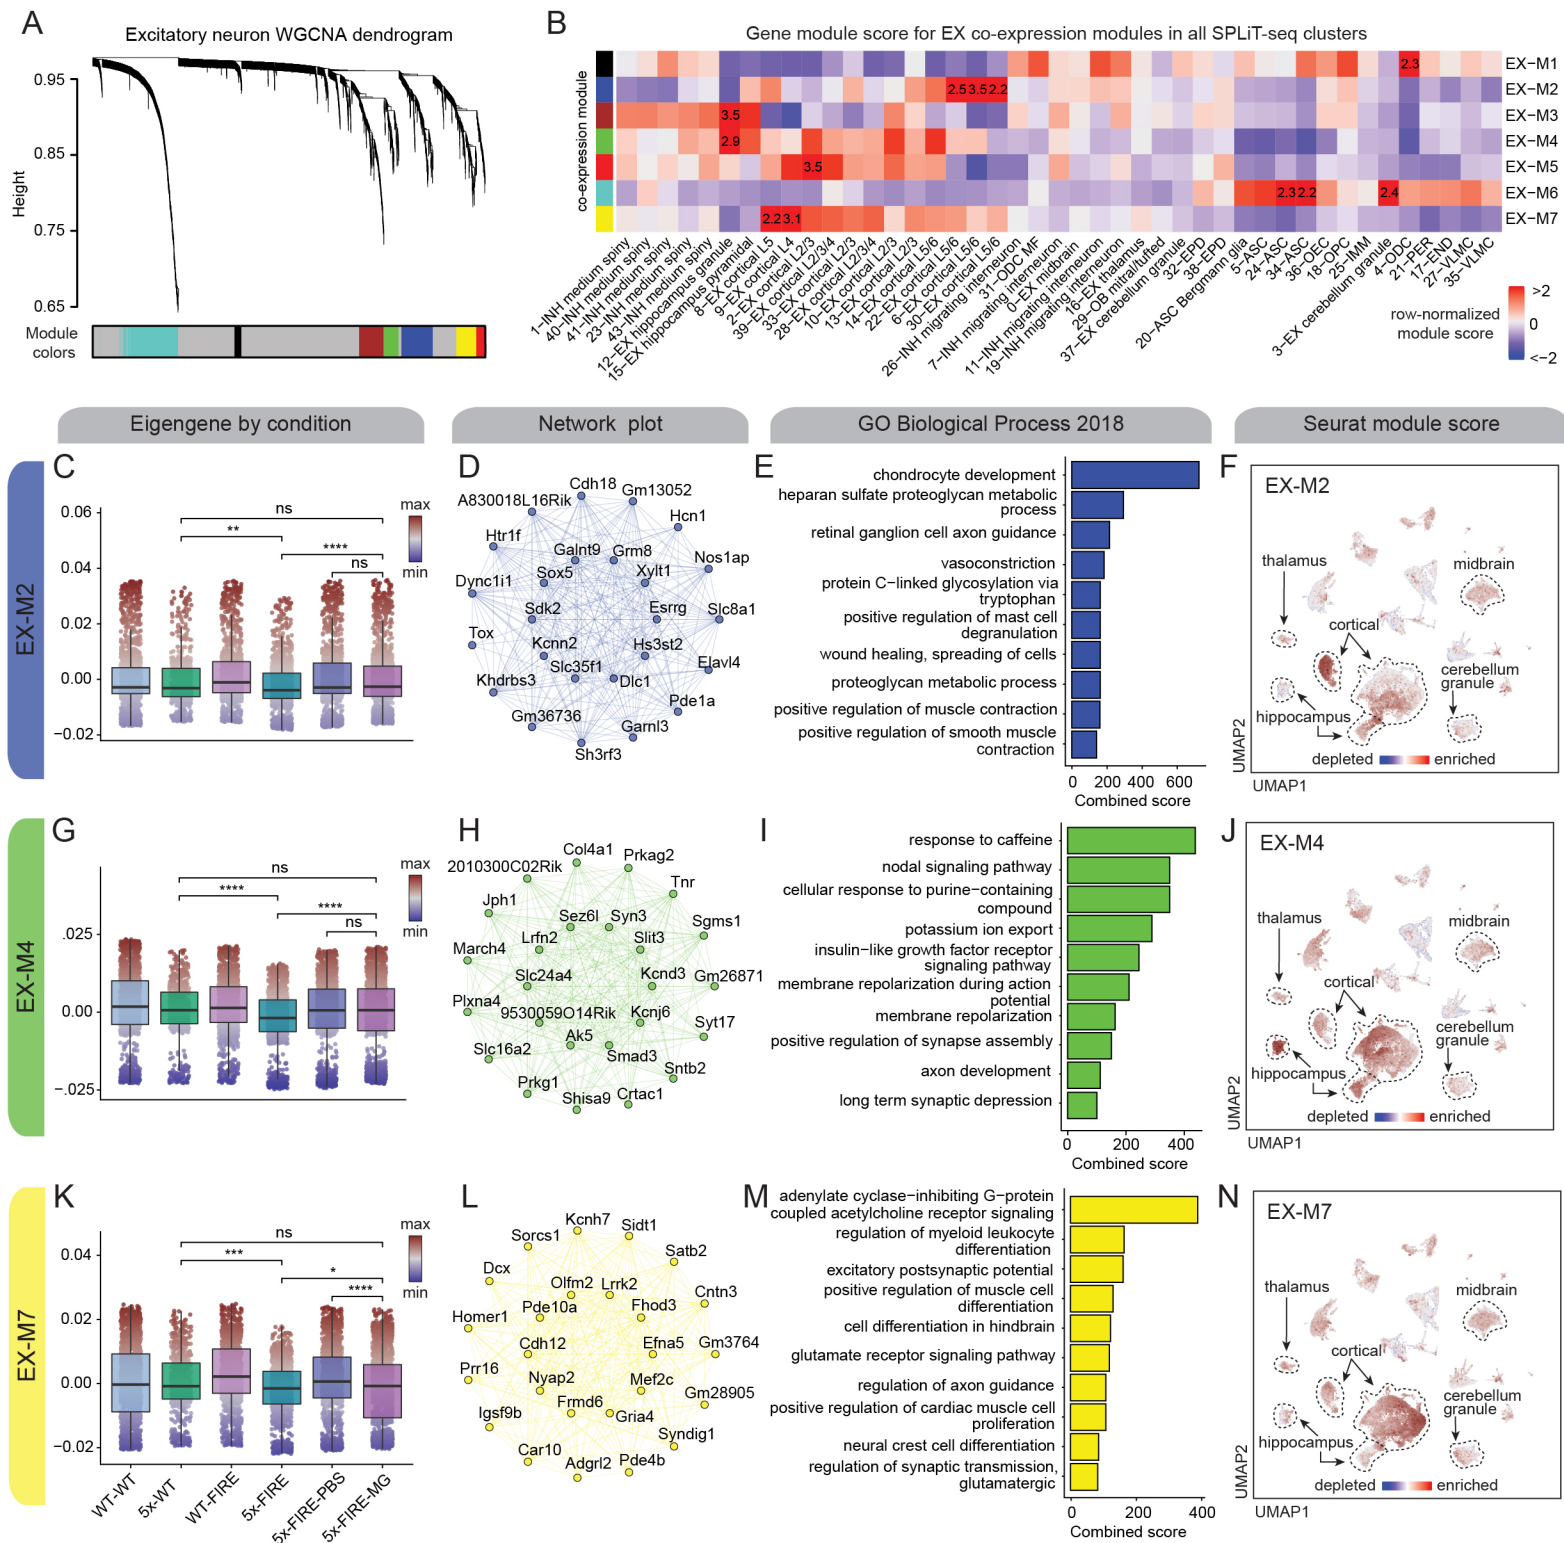

**Supplemental Figure 10: Gene co-expression networks in excitatory neurons.** Related to Figure 1, 3, 5, and 6. **(A)** scWGCNA dendrogram showing co-expression modules in excitatory neurons with gene module assignments shown below. **(B)** Row-normalized heatmap of Seurat module scores by SPLiT-seq clusters for all EX WGCNA modules as in **(A,C)**: Box and whisker plots with underlying data points for EX-M2 eigengene values split by experimental condition. Box boundaries correspond to the interquartile range (IQR), the line represents the median, and the whiskers extend to the lowest/highest points that are not further than 1.5 times the IQR from the box boundary. **(D)** Co-expression network plot showing the 25 most connected genes for EX-M2. **(E)** Bar plot showing GO term enrichment for EX-M2 genes. **(F)** UMAP colored by Seurat module score for EX-M2 with astrocytes circled. **(G-J)** Eigengene box and whisker plot, co-expression network plot, GO term enrichment, and module score UMAP as in **C-F** for EX-M4. **(K-N)**: Eigengene box and whisker plot, co-expression network plot, GO term enrichment, and module score UMAP as in **(C-F)** for EX-M7. For box and whisker plots, two-sided Wilcoxon test was used to compare selected groups; not significant,  $P > 0.05$ ; \* $P \leq 0.05$ , \*\* $P \leq 0.01$ , \*\*\* $P \leq 0.001$ , \*\*\*\* $P \leq 0.0001$ .



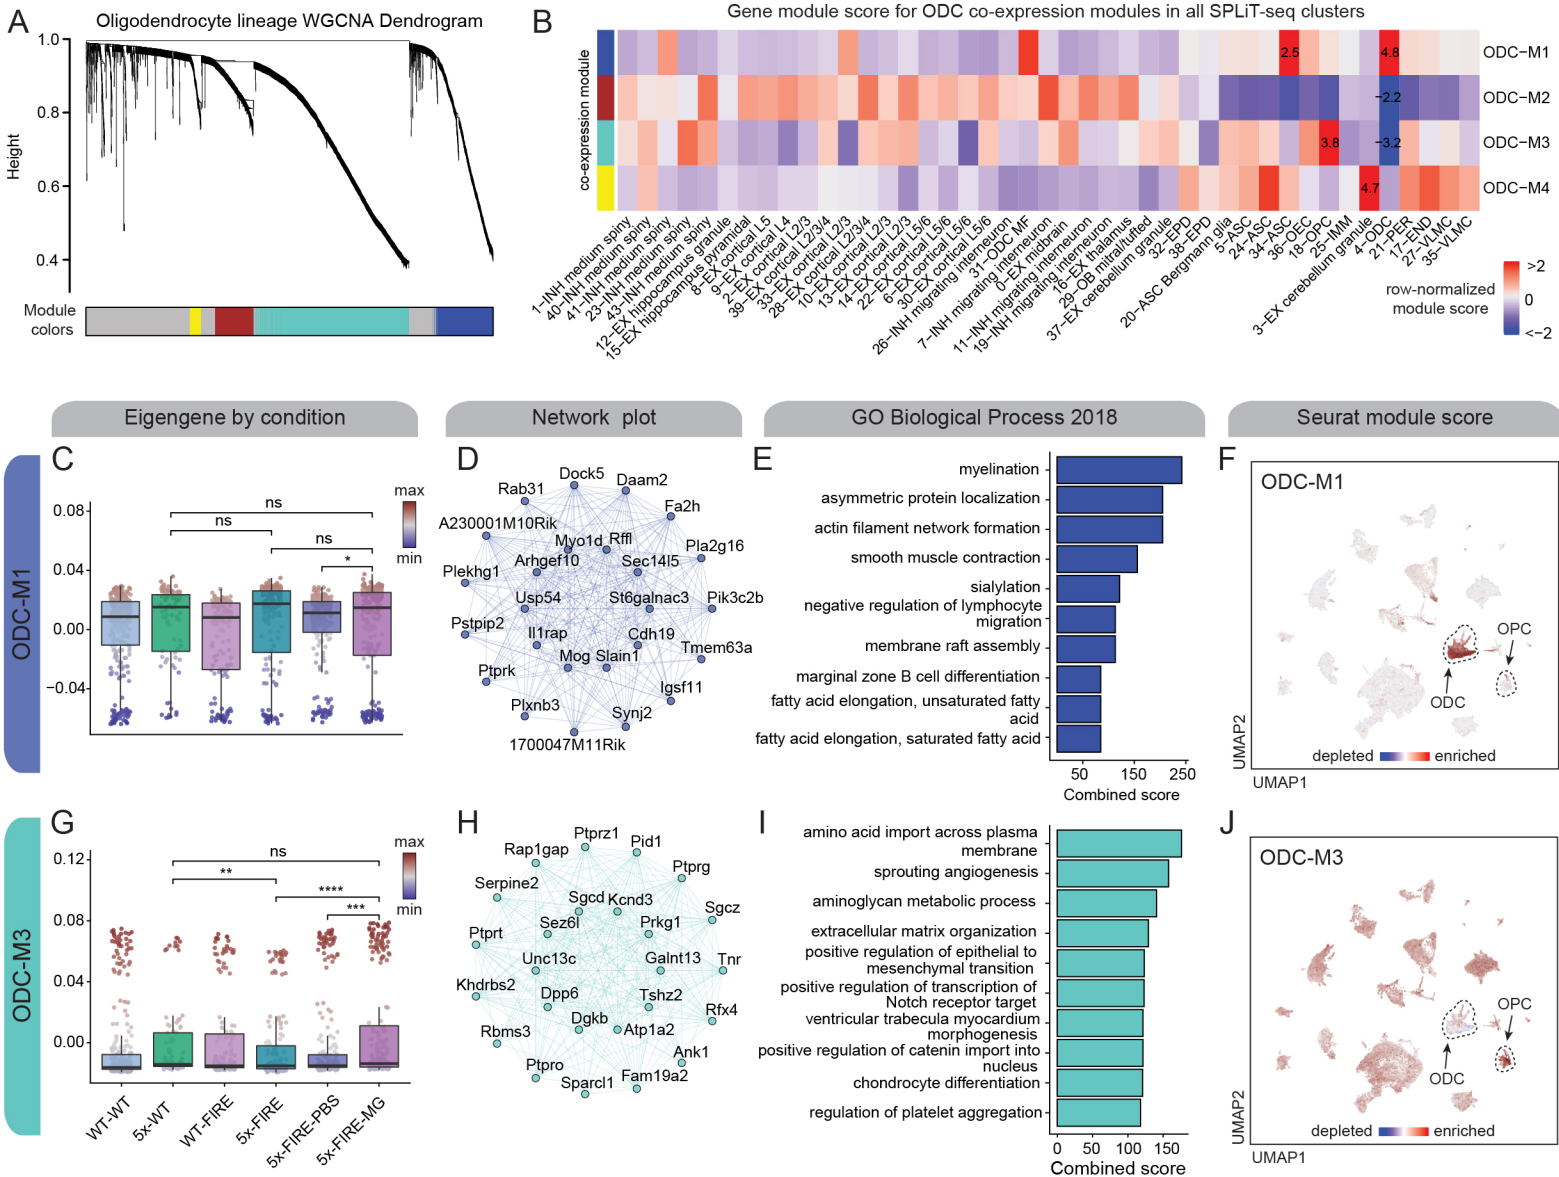

**Supplemental Figure 11: Gene co-expression networks in the oligodendrocyte lineage.** Related to Figure 1, 3, 5, and 6. **(A)** scWGCNA dendrogram showing co-expression modules in oligodendrocyte lineage cells (ODCs and OPCs) with gene module assignments shown below. **(B)** Row-normalized heatmap of Seurat module scores by SPLiT-seq clusters for all ODC WGCNA modules as in **(A)**. **(C)** Box and whisker plots with underlying data points for ODC-M1 eigengene values split by experimental condition. Box boundaries correspond to the interquartile range (IQR), the line represents the median, and the whiskers extend to the lowest/highest points that are not further than 1.5 times the IQR from the box boundary. **(D)** Co-expression network plot showing the 25 most connected genes for ODC-M1. **(E)** Bar plot showing GO term enrichment for ODC-M1 genes. **(F)** UMAP colored by Seurat module score for ODC-M1 with ODCs and OPCs circled. **(G-J)** Eigengene box and whisker plot, co-expression network plot, GO term enrichment, and module score UMAP as in (C-F) for ODC-M3. For box and whisker plots, two-sided Wilcoxon test was used to compare selected groups; not significant,  $P > 0.05$ ; \* $P \leq 0.05$ , \*\* $P \leq 0.01$ , \*\*\* $P \leq 0.001$ , \*\*\*\* $P \leq 0.0001$ .

Figure S12

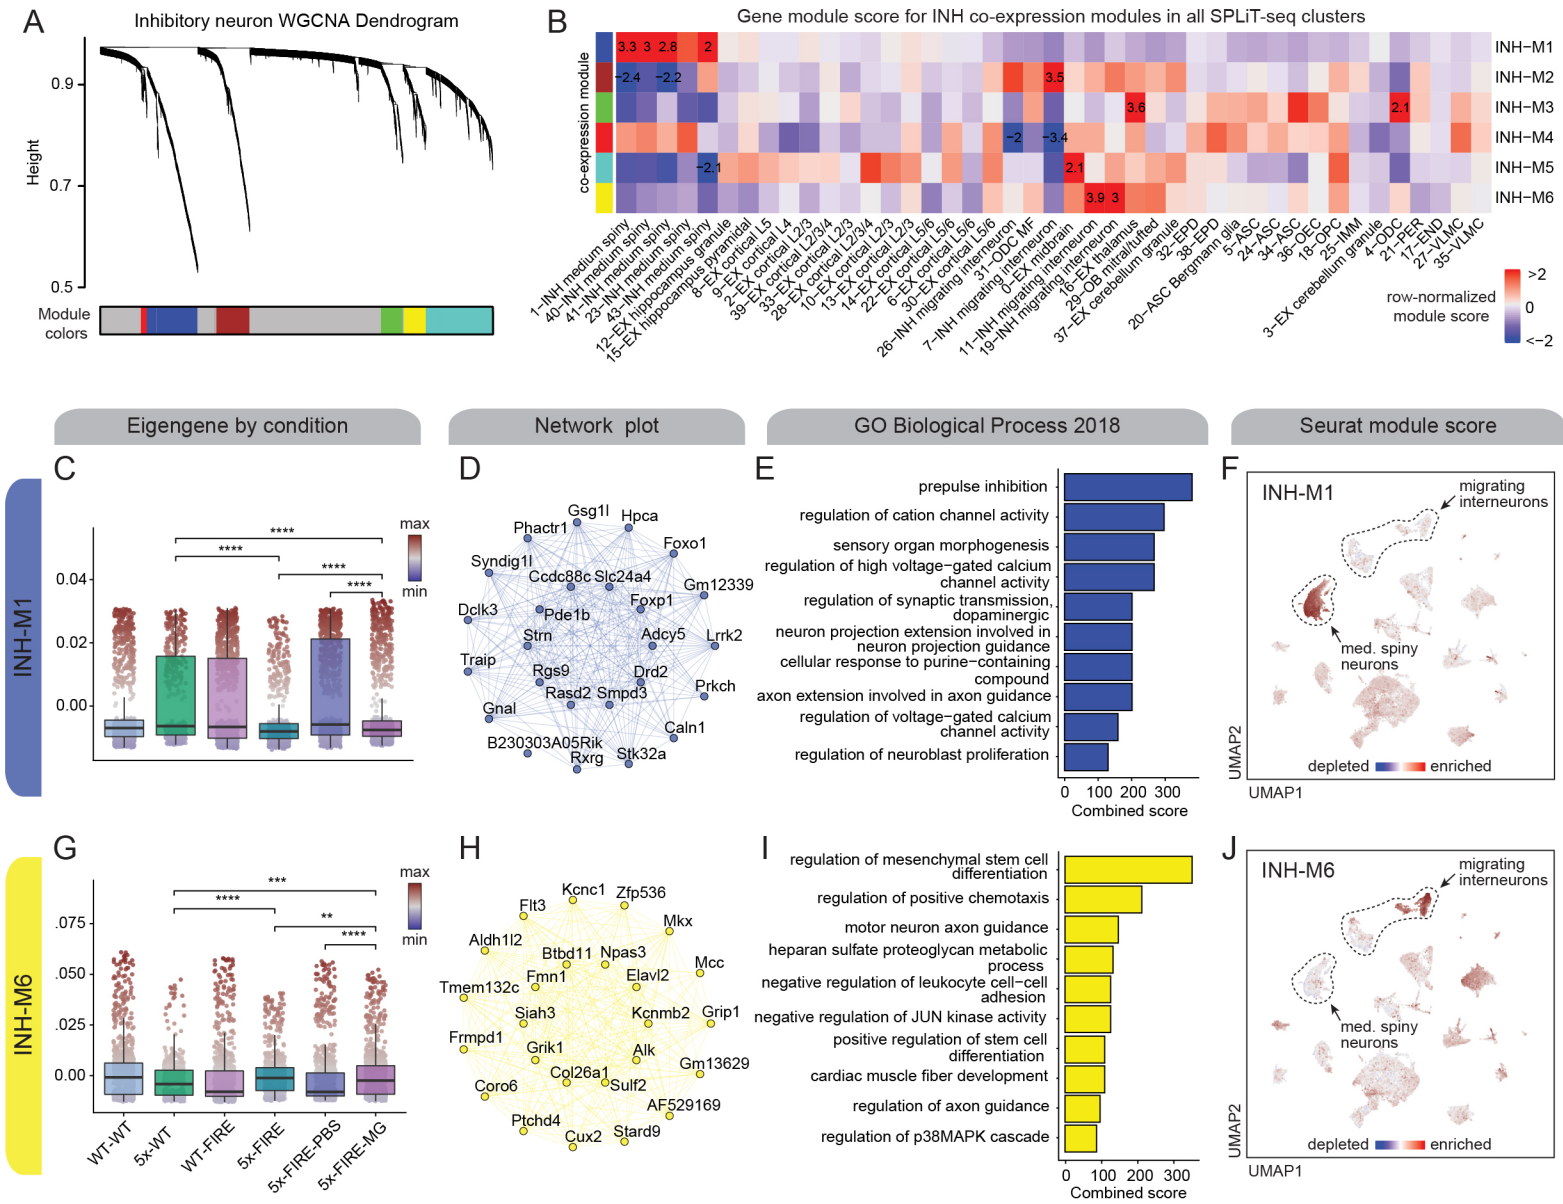

**Supplemental Figure 12: Gene co-expression networks in inhibitory neurons.** Related to Figure 1, 3, 5, and 6. **(A)** scWGCNA dendrogram showing co-expression modules in inhibitory neurons with gene module assignments shown below. **(B)** Row-normalized heatmap of Seurat module scores by SPLiT-seq clusters for all INH WGCNA modules as in **(A, C)** Box and whisker plots with underlying data points for INH-M1 eigengene values split by experimental condition. Box boundaries correspond to the interquartile range (IQR), the line represents the median, and the whiskers extend to the lowest/highest points that are not further than 1.5 times the IQR from the box boundary. **(D)** Co-expression network plot showing the 25 most connected genes for INH-M1. **(E)** Bar plot showing GO term enrichment for INH-M1 genes. **(F)** UMAP colored by Seurat module score for INH-M1 with END and PER clusters circled. **(G-J)** Eigengene box and whisker plot, co-expression network plot, GO term enrichment, and module score UMAP as in **(C-F)** for INH-M6. For box and whisker plots, two-sided Wilcoxon test was used to compare selected groups; not significant,  $P > 0.05$ ; \* $P \leq 0.05$ , \*\* $P \leq 0.01$ , \*\*\* $P \leq 0.001$ , \*\*\*\* $P \leq 0.0001$ .



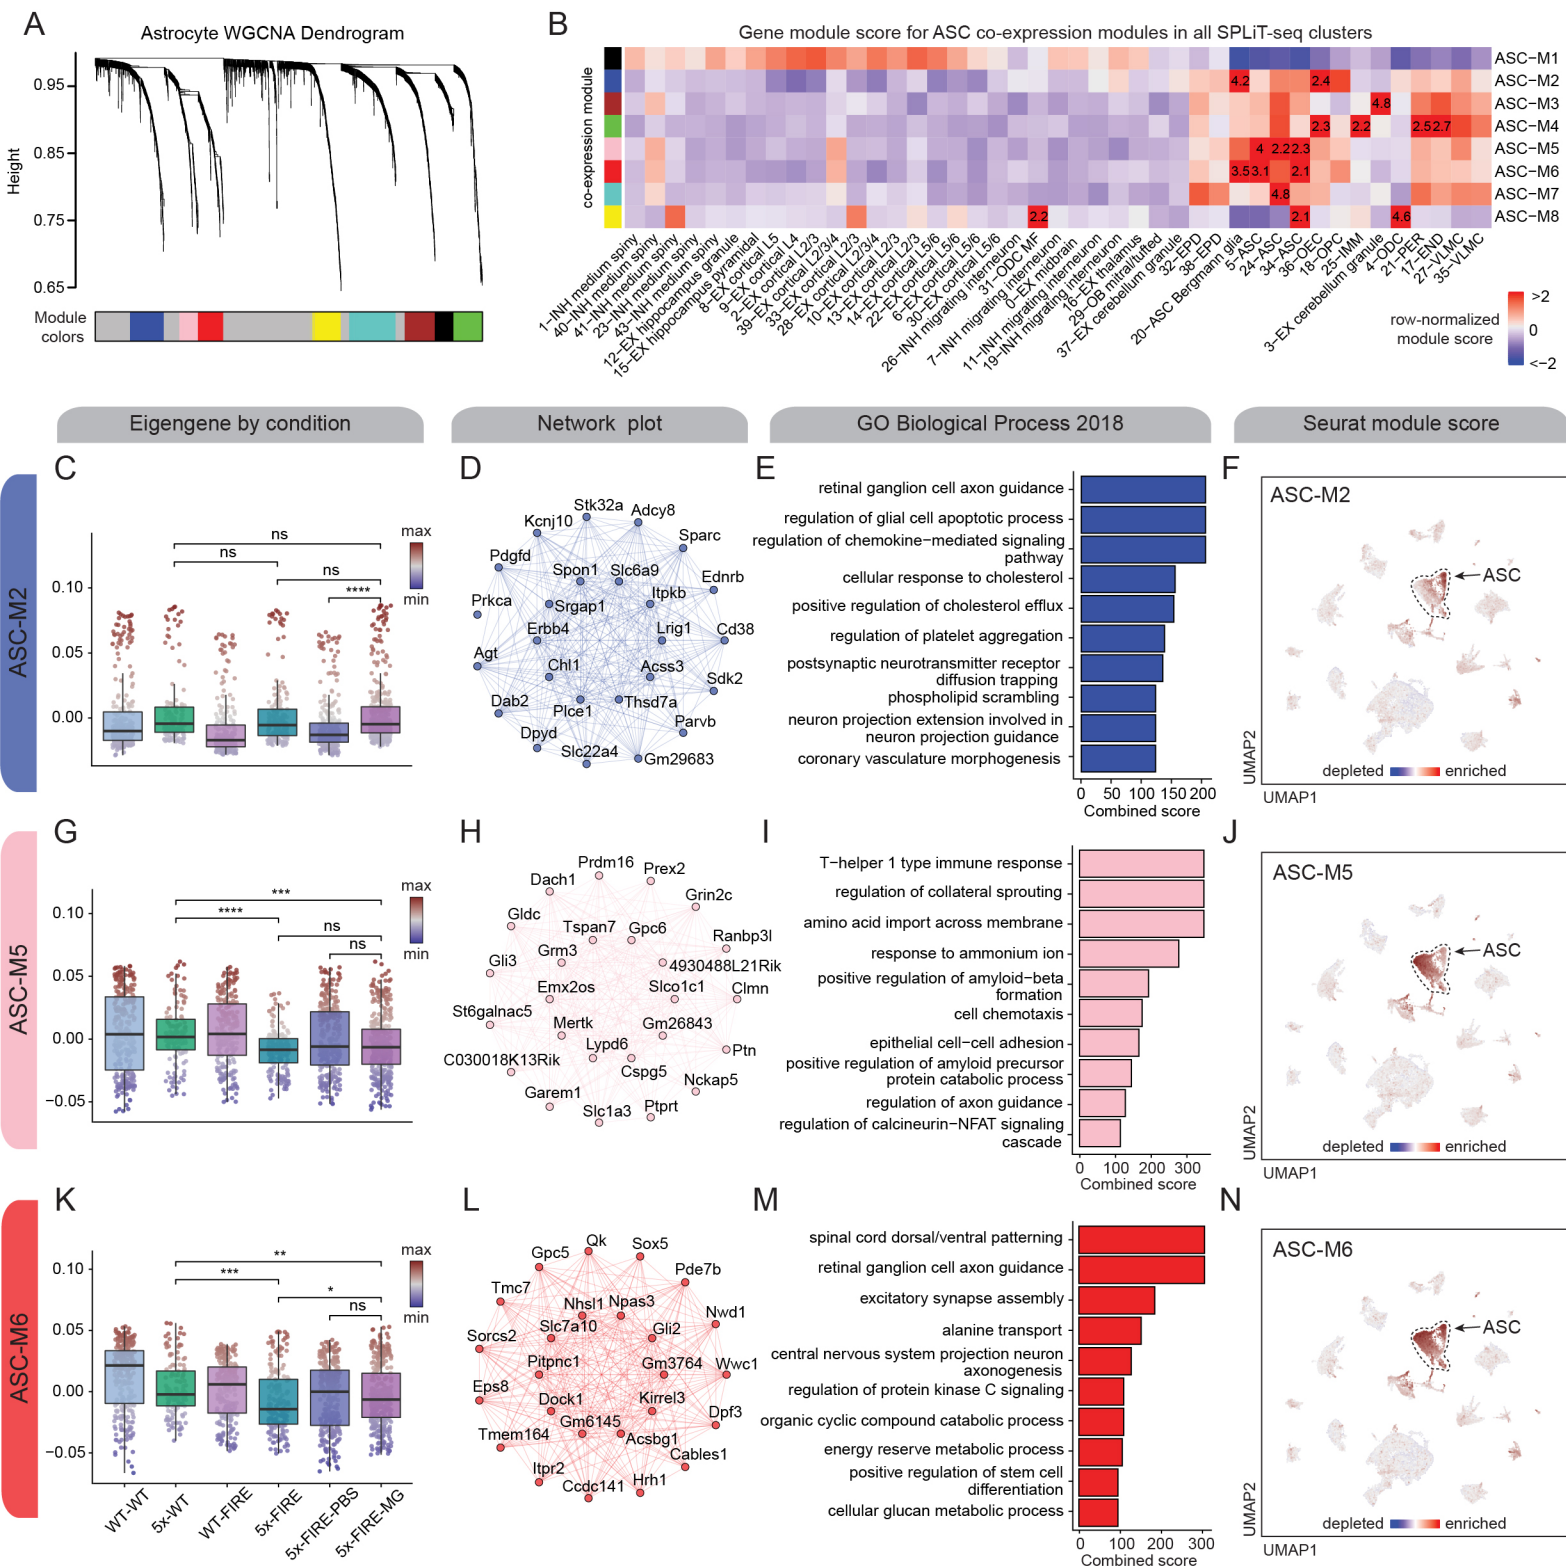

**Supplemental Figure 13: Gene co-expression networks in astrocytes.** Related to Figure 1, 3, 5, and 6. **(A)** scWGCNA dendrogram showing co-expression modules in astrocytes with gene module assignments shown below. **(B)** Row-normalized heatmap of Seurat module scores by SPLiT-seq clusters for all ASC WGCNA modules as in **(A, C)** Box and whisker plots with underlying data points for ASC-M2 eigengene values split by experimental condition. Box boundaries correspond to the interquartile range (IQR), the line represents the median, and the whiskers extend to the lowest/highest points that are not further than 1.5 times the IQR from the box boundary. **(D)** Co-expression network plot showing the 25 most connected genes for ASC-M2. **(E)** Bar plot showing GO term enrichment for ASC-M2 genes. **(F)** UMAP colored by Seurat module score for ASC-M2 with astrocytes circled. **(G-J)** Eigengene box and whisker plot, co-expression network plot, GO term enrichment, and module score UMAP as in (C-F) for ASC-M5. **(K-N)** Eigengene box and whisker plot, co-expression network plot, GO term enrichment, and module score UMAP as in (C-F) for ASC-M6. For box and whisker plots, two-sided Wilcoxon test was used to compare selected groups; not significant,  $P > 0.05$ ; \* $P \leq 0.05$ , \*\* $P \leq 0.01$ , \*\*\* $P \leq 0.001$ , \*\*\*\* $P \leq 0.0001$ .

## No indication of cerebral hemorrhages or brain calcification in 2-month-old mice

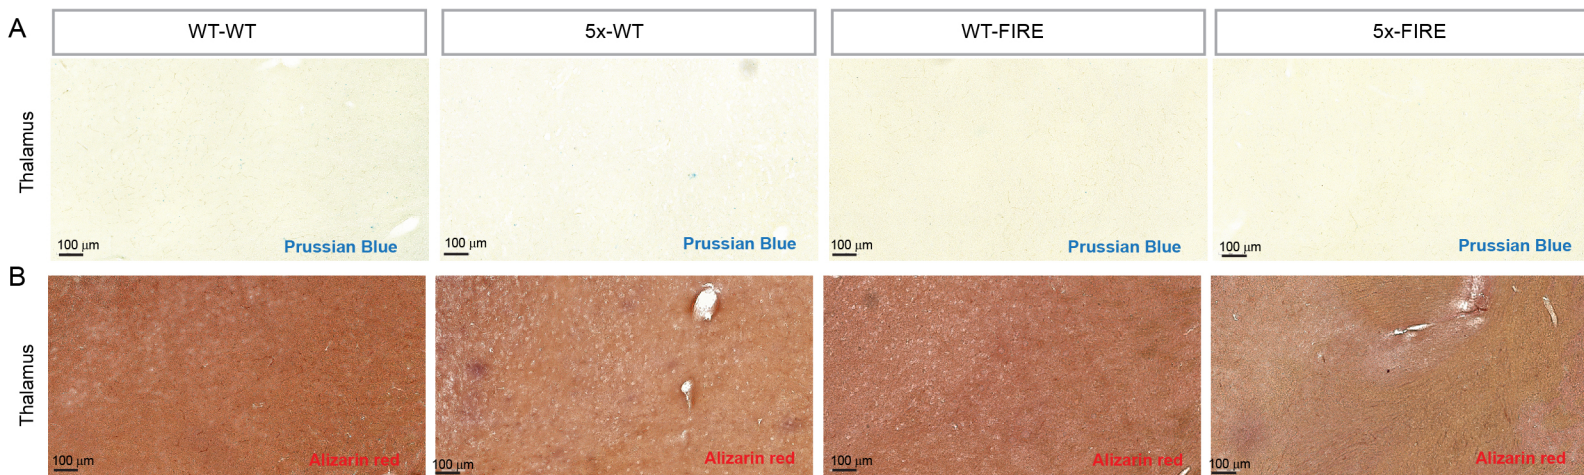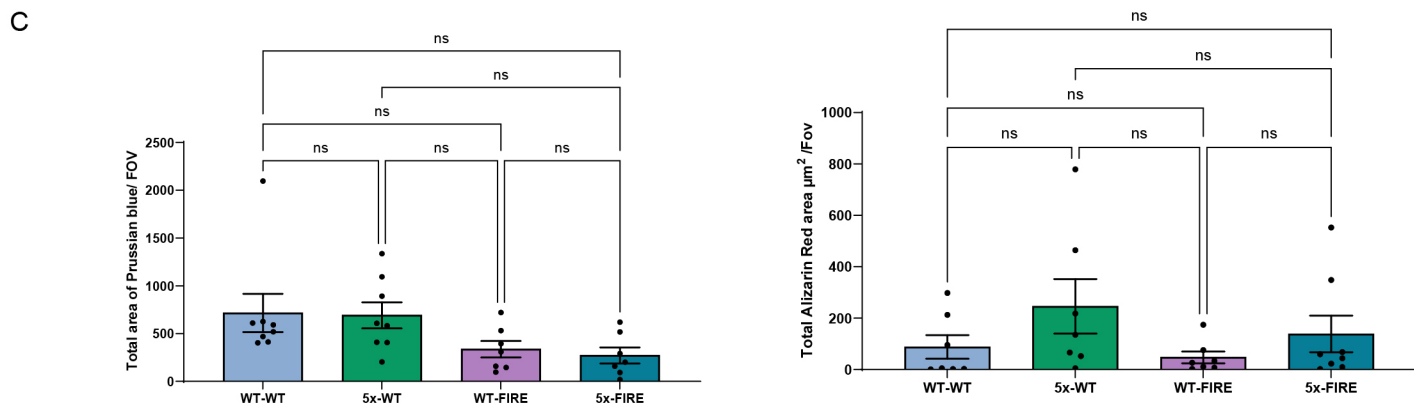

**Supplemental Figure 14: 2-month-old WT-FIRE and 5x-FIRE mice show no evidence of cerebral hemorrhages or brain calcification.** Related to Figure 5, 6 and 7. To determine whether the previously observed effects of combined amyloid pathology and microglial absence on brain hemorrhages and calcification might arise during development we examined young adult mice (2-month-old) from each of the four core genotypes. **(A)** Prussian Blue labeling (thalamus shown) revealed no evidence of blood brain barrier dysfunction or cerebral hemorrhages in either WT-WT, 5x-WT, WT-FIRE, or 5x-FIRE mice. **(B)** No evidence of Alizarin Red labeling was detected within the thalamus (shown) or any other brain region of WT-WT, 5x-WT, WT-FIRE, or 5x-FIRE mice. **(C)** Quantification of Prussian Blue and Alizarin Red labeling revealed no significant increase in signal intensity above WT-WT background levels. Scale Bars =100mm in A and B. All data presented as mean  $\pm$  s.e.m.
